# Supplementary material for: Calcium carbide as a dehydrating agent for the synthesis of carbamates, glycerol carbonate, and cyclic carbonates from carbon dioxide
Source: Royal Society of Chemistry journal article supplement (doi:10.1039/d0gc01402h), 2020-01-01
Supplement: d0gc01402h1.pdf [file d0gc01402h1.pdf]

Supporting Information for

## Calcium carbide as a dehydrating agent for the synthesis of carbamates, glycerol carbonate, and cyclic carbonates from carbon dioxide

Qiao Zhang,<sup>a</sup> Hao-Yu Yuan,<sup>b</sup> Xiao-Tao Lin,<sup>ab</sup> Norihisa Fukaya,<sup>a</sup> Tadahiro Fujitani,<sup>a</sup> Kazuhiko Sato,<sup>a</sup> and Jun-Chul Choi<sup>\*ab</sup>

<sup>a</sup> National Institute of Advanced Industrial Science and Technology (AIST), Tsukuba Central 5, 1-1-1 Higashi, Tsukuba, Ibaraki 305-8565, Japan.

<sup>b</sup> Graduate School of Pure and Applied Sciences, University of Tsukuba, 1-1-1 Tennodai, Tsukuba, Ibaraki 305-8573, Japan.

\*Corresponding author. Email: [junchul.choi@aist.go.jp](mailto:junchul.choi@aist.go.jp). Tel: (+81) 029-861-9283.

### Contents

#### Page S2:

Screening of reaction conditions of the synthesis of **1**.

#### Page S3:

Screening of reaction conditions of the synthesis of glycerol carbonate.

#### Pages S4–S9:

<sup>1</sup>H NMR, <sup>13</sup>C{<sup>1</sup>H} NMR, and MS data for isolated products **1–23**.

#### Pages S10–S32:

<sup>1</sup>H and <sup>13</sup>C{<sup>1</sup>H} NMR spectra for isolated products **1–23**.

## Screening of reaction conditions of the synthesis of 1.

Standard reaction condition:

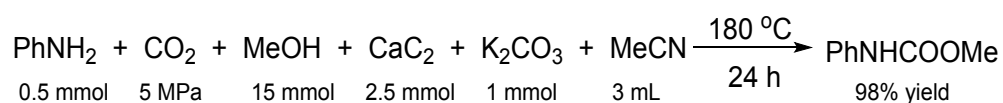

Tables S1–S4 investigated variation from standard condition.

Table S1. The influence of CaC<sub>2</sub>

| CaC <sub>2</sub> | HPLC yield |
|------------------|------------|
| 1.25 mmol        | 73%        |
| 2.5 mmol         | 98%        |

Table S2. The influence of K<sub>2</sub>CO<sub>3</sub>

| K <sub>2</sub> CO <sub>3</sub> | HPLC yield |
|--------------------------------|------------|
| 0.05 mmol                      | 39%        |
| 0.5 mmol                       | 90%        |
| 1 mmol                         | 98%        |
| 2 mmol                         | 61%        |

Table S3. The influence of solvent

| solvent          | HPLC yield |
|------------------|------------|
| MeCN             | 98%        |
| DMAc             | 94%        |
| NMP              | 90%        |
| toluene          | 60%        |
| MeOH             | 49%        |
| MEK              | 48%        |
| DMF              | 37%        |
| THF              | 33%        |
| PEG 400          | 26%        |
| <i>p</i> -xylene | 17%        |

Table S4. The influence of CO<sub>2</sub> pressure

| CO <sub>2</sub> pressure | HPLC yield |
|--------------------------|------------|
| 1 MPa                    | 80%        |
| 3 MPa                    | 91%        |
| 5 MPa                    | 98%        |

## Screening of reaction conditions of the synthesis of glycerol carbonate.

Standard reaction condition:

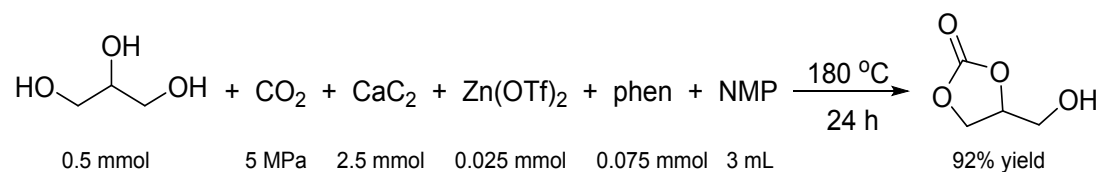

Tables S5–S6 investigated variation from standard condition.

Table S5. The influence of CaC<sub>2</sub>

| CaC <sub>2</sub> | <sup>1</sup> H NMR yield |
|------------------|--------------------------|
| 1.25 mmol        | 69%                      |
| 2.5 mmol         | 92%                      |

Table S6. The influence of CO<sub>2</sub> pressure

| CO <sub>2</sub> pressure | <sup>1</sup> H NMR yield |
|--------------------------|--------------------------|
| 1 MPa                    | 46%                      |
| 3 MPa                    | 72%                      |
| 5 MPa                    | 92%                      |

Table S7. The influence of high temperature (210 °C) on the yields.

| Time (h) | <sup>1</sup> H NMR yield |
|----------|--------------------------|
| 2        | 68%                      |
| 4        | 91%                      |

Table S8. Investigation of turnover numbers (TON).

| Zn(OTf) <sub>2</sub> (mmol) | phen (mmol) | <sup>1</sup> H NMR yield | TON  |
|-----------------------------|-------------|--------------------------|------|
| 0.025                       | 0.075       | 92%                      | 18.4 |
| 0.005                       | 0.015       | 49%                      | 49   |

Product 1.

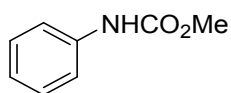

$^1\text{H}$  NMR (400 MHz,  $\text{DMSO-}d_6$ ):  $\delta$  (ppm) 9.64 (s, 1H), 7.46 (d, 2H,  $J = 8.0$  Hz), 7.28 (t, 2H,  $J = 7.4$ Hz), 6.98 (d, 1H,  $J = 7.4$ Hz), 3.67 (s, 3H).

$^{13}\text{C}\{^1\text{H}\}$  NMR (100 MHz,  $\text{DMSO-}d_6$ ):  $\delta$  (ppm) 154.5, 139.6, 129.2, 122.8, 118.6, 52.0.

GC-MS ( $m/z$ ): 151 for  $\text{C}_8\text{H}_9\text{NO}_2$ .

Product 2.

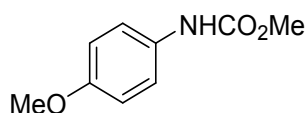

$^1\text{H}$  NMR (400 MHz,  $\text{DMSO-}d_6$ ):  $\delta$  (ppm) 9.41 (s, 1H), 7.34 (d, 2H,  $J = 8.8$  Hz), 6.85 (d, 2H,  $J = 7.6$  Hz), 3.70 (s, 3H), 3.63 (s, 3H).

$^{13}\text{C}\{^1\text{H}\}$  NMR (100 MHz,  $\text{DMSO-}d_6$ ):  $\delta$  (ppm) 155.2, 154.6, 132.6, 120.3, 114.4, 55.6, 51.9.

GC-MS ( $m/z$ ): 181 for  $\text{C}_9\text{H}_9\text{NO}_3$ .

Product 3.

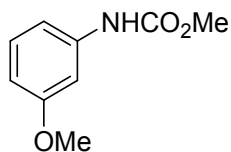

$^1\text{H}$  NMR (400 MHz,  $\text{DMSO-}d_6$ ):  $\delta$  (ppm) 9.60 (s, 1H), 7.19–7.13 (m, 2H), 7.01 (d, 2H,  $J = 8.0$  Hz), 6.57 (d, 1H,  $J = 8.0$  Hz), 3.71 (s, 3H), 3.65 (s, 3H).

$^{13}\text{C}\{^1\text{H}\}$  NMR (100 MHz,  $\text{DMSO-}d_6$ ):  $\delta$  (ppm) 159.6, 153.9, 140.3, 129.5, 110.5, 107.6, 104.1, 54.9, 51.6.

GC-MS ( $m/z$ ): 181 for  $\text{C}_9\text{H}_9\text{NO}_3$ .

Product 4.

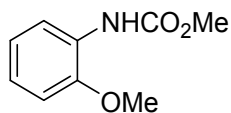

$^1\text{H}$  NMR (400 MHz,  $\text{DMSO-}d_6$ ):  $\delta$  (ppm) 8.40 (s, 1H), 7.63 (d, 1H,  $J = 7.6$  Hz), 7.08–6.99 (m, 2H), 6.93–6.88 (m, 1H), 3.79 (s, 3H), 3.64 (s, 3H).

$^{13}\text{C}\{^1\text{H}\}$  NMR (100 MHz,  $\text{DMSO-}d_6$ ):  $\delta$  (ppm) 154.7, 150.6, 127.5, 124.7, 122.2, 120.7, 111.7, 56.0, 52.1.

GC-MS ( $m/z$ ): 181 for  $\text{C}_9\text{H}_9\text{NO}_3$ .

Product 5.

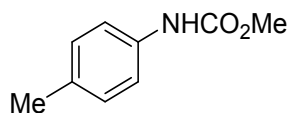

$^1\text{H}$  NMR (400 MHz,  $\text{DMSO-}d_6$ ):  $\delta$  (ppm) 9.50 (s, 1H), 7.32 (d, 2H,  $J = 8.0$  Hz), 7.07 (d, 2H,  $J = 7.6$  Hz), 3.64 (s, 3H), 2.22 (s, 3H).

$^{13}\text{C}$  { $^1\text{H}$ } NMR (100 MHz,  $\text{DMSO-}d_6$ ):  $\delta$  (ppm) 154.1, 136.6, 131.2, 129.2, 118.3, 51.5, 20.4.

GC-MS ( $m/z$ ): 165 for  $\text{C}_9\text{H}_{11}\text{NO}_2$ .

#### Product 6.

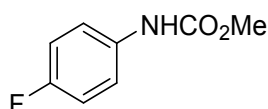

$^1\text{H}$  NMR (400 MHz,  $\text{DMSO-}d_6$ ):  $\delta$  (ppm) 9.68 (s, 1H), 7.47–7.43 (m, 2H), 7.14–7.10 (m, 2H), 3.65 (s, 3H).

$^{13}\text{C}$  { $^1\text{H}$ } NMR (100 MHz,  $\text{DMSO-}d_6$ ):  $\delta$  (ppm) 159.2, 156.9, 154.5, 136.0, 120.3, 115.9, 115.7, 52.1.

GC-MS ( $m/z$ ): 169 for  $\text{C}_8\text{H}_8\text{NO}_2\text{F}$ .

#### Product 7.

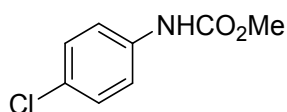

$^1\text{H}$  NMR (400 MHz,  $\text{DMSO-}d_6$ ):  $\delta$  (ppm) 9.77 (s, 1H), 7.49–7.47 (m, 2H), 7.35–7.32 (m, 2H), 3.67 (s, 3H).

$^{13}\text{C}$  { $^1\text{H}$ } NMR (100 MHz,  $\text{DMSO-}d_6$ ):  $\delta$  (ppm) 154.4, 138.6, 129.1, 126.5, 120.1, 52.2.

GC-MS ( $m/z$ ): 185 for  $\text{C}_8\text{H}_9\text{NO}_2\text{Cl}$ .

#### Product 8.

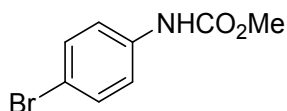

$^1\text{H}$  NMR (400 MHz,  $\text{DMSO-}d_6$ ):  $\delta$  (ppm) 9.78 (s, 1H), 7.47–7.41 (m, 4H), 3.66 (s, 3H).

$^{13}\text{C}$  { $^1\text{H}$ } NMR (100 MHz,  $\text{DMSO-}d_6$ ):  $\delta$  (ppm) 154.3, 139.0, 131.9, 120.4, 114.3, 52.2.

GC-MS ( $m/z$ ): 231 for  $\text{C}_8\text{H}_9\text{NO}_2\text{Br}$ .

#### Product 9.

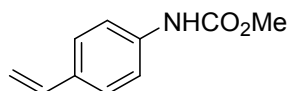

$^1\text{H}$  NMR (400 MHz,  $\text{DMSO-}d_6$ ):  $\delta$  (ppm) 9.72 (s, 1H), 7.46–7.38 (m, 4H), 6.69–6.62 (m, 1H), 5.71 (d, 2H), 5.15 (d, 2H), 3.67 (s, 3H).

$^{13}\text{C}$  { $^1\text{H}$ } NMR (100 MHz,  $\text{DMSO-}d_6$ ):  $\delta$  (ppm) 154.0, 139.0, 136.2, 131.5, 126.7, 118.2, 112.5, 51.7.

GC-MS (*m/z*): 177 for C<sub>10</sub>H<sub>11</sub>NO<sub>2</sub>.

**Product 10.**

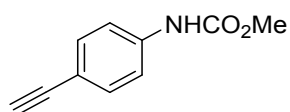

<sup>1</sup>H NMR (400 MHz, DMSO-*d*<sub>6</sub>): δ (ppm) 9.88 (s, 1H), 7.47 (d, 2H, *J* = 8.8 Hz), 7.40 (d, 2H, *J* = 8.8 Hz), 4.06 (s, 1H), 3.68 (s, 3H).

<sup>13</sup>C {<sup>1</sup>H} NMR (100 MHz, DMSO-*d*<sub>6</sub>): δ (ppm) 154.3, 140.3, 132.9, 118.3, 115.7, 84.1, 80.0, 52.3.

GC-MS (*m/z*): 175 for C<sub>10</sub>H<sub>9</sub>NO<sub>2</sub>.

**Product 11.**

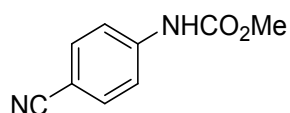

<sup>1</sup>H NMR (400 MHz, DMSO-*d*<sub>6</sub>): δ (ppm) 10.20 (s, 1H), 7.75 (d, 2H, *J* = 8.8 Hz), 7.63 (d, 2H, *J* = 8.8 Hz), 3.71 (s, 3H).

<sup>13</sup>C {<sup>1</sup>H} NMR (100 MHz, DMSO-*d*<sub>6</sub>): δ (ppm) 154.2, 144.1, 133.8, 119.6, 118.5, 104.5, 52.5.

GC-MS (*m/z*): 176 for C<sub>9</sub>H<sub>8</sub>N<sub>2</sub>O<sub>2</sub>.

**Product 12.**

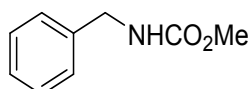

<sup>1</sup>H NMR (400 MHz, DMSO-*d*<sub>6</sub>): δ (ppm) 7.71 (s, 1H), 7.39–7.36 (m, 2H), 7.31–7.27 (m, 3H), 4.24 (d, 2H), 3.61 (s, 3H).

<sup>13</sup>C {<sup>1</sup>H} NMR (100 MHz, DMSO-*d*<sub>6</sub>): δ (ppm) 157.4, 140.3, 128.7, 127.5, 127.2, 51.8, 44.3.

GC-MS (*m/z*): 165 for C<sub>9</sub>H<sub>11</sub>NO<sub>2</sub>.

**Product 13.**

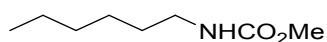

<sup>1</sup>H NMR (400 MHz, DMSO-*d*<sub>6</sub>): δ (ppm) 7.09 (s, 1H), 3.50 (s, 3H), 2.95 (q, 2H, *J* = 6.2 Hz), 1.37–1.24 (m, 8H), 0.86 (t, 3H, *J* = 7.2 Hz).

<sup>13</sup>C {<sup>1</sup>H} NMR (100 MHz, DMSO-*d*<sub>6</sub>): δ (ppm) 157.1, 51.5, 31.4, 29.9, 29.6, 26.6, 22.5, 14.4.

GC-MS (*m/z*): 159 for C<sub>8</sub>H<sub>17</sub>NO<sub>2</sub>.

**Product 14.**

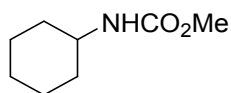

$^1\text{H}$  NMR (400 MHz,  $\text{DMSO-}d_6$ ):  $\delta$  (ppm) 6.99 (s, 1H), 3.49 (s, 3H), 3.24–3.22 (m, 1H), 1.74–1.64 (m, 4H), 1.55–1.51 (m, 1H), 1.24–1.08 (m, 5H).

$^{13}\text{C}\{^1\text{H}\}$  NMR (100 MHz,  $\text{DMSO-}d_6$ ):  $\delta$  (ppm) 155.8, 50.9, 49.4, 32.7, 25.1, 24.6.

GC-MS ( $m/z$ ): 157 for  $\text{C}_8\text{H}_{15}\text{NO}_2$ .

**Product 15.**

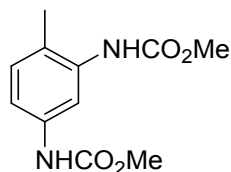

$^1\text{H}$  NMR (400 MHz,  $\text{DMSO-}d_6$ ):  $\delta$  (ppm) 9.52 (s, 1H), 8.79 (s, 1H), 7.49 (s, 1H), 7.17 (d, 1H,  $J = 8.0$  Hz), 7.07 (d, 1H,  $J = 8.0$  Hz), 3.65 (s, 6H), 2.12 (s, 3H).

$^{13}\text{C}\{^1\text{H}\}$  NMR (100 MHz,  $\text{DMSO-}d_6$ ):  $\delta$  (ppm) 155.2, 154.4, 137.6, 136.9, 130.7, 126.1, 115.5, 115.4, 52.1, 52.0, 17.5.

GC-MS ( $m/z$ ): 174 for the corresponding isocyanate.

**Product 16.**

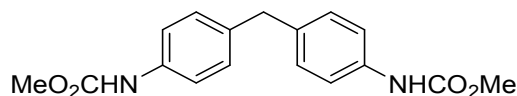

$^1\text{H}$  NMR (400 MHz,  $\text{DMSO-}d_6$ ):  $\delta$  (ppm) 9.54 (s, 2H), 7.34 (d, 4H,  $J = 8.0$  Hz), 7.10 (m, 4H), 3.78 (s, 2H), 3.63 (s, 6H).

$^{13}\text{C}\{^1\text{H}\}$  NMR (100 MHz,  $\text{DMSO-}d_6$ ):  $\delta$  (ppm) 154.4, 137.5, 135.9, 129.3, 118.8, 52.0.

GC-MS ( $m/z$ ): 250 for the corresponding isocyanate.

**Product 17.**

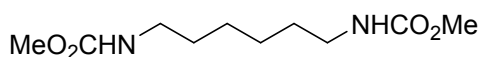

$^1\text{H}$  NMR (400 MHz,  $\text{DMSO-}d_6$ ):  $\delta$  (ppm) 7.10 (s, 2H), 3.51 (s, 6H), 2.96–2.94 (m, 4H), 1.37 (s, 4H), 1.23 (s, 4H).

$^{13}\text{C}\{^1\text{H}\}$  NMR (100 MHz,  $\text{DMSO-}d_6$ ):  $\delta$  (ppm) 157.1, 51.6, 29.8, 26.4.

**Product 18.**

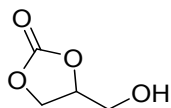

<sup>1</sup>H NMR (DMSO-*d*<sub>6</sub>, 400 MHz) δ 5.27 (t, *J* = 5.6 Hz, 1H), 4.83-4.77 (m, 1H), 4.50 (dd, *J* = 8.4 Hz, 8.6 Hz, 1H), 4.29 (dd, *J* = 8.3 Hz, 8.1 Hz, 1H), 3.70-3.63 (m, 1H), 3.55-3.48 (m, 1H).

<sup>13</sup>C {<sup>1</sup>H} NMR (DMSO-*d*<sub>6</sub>, 100 MHz) δ 155.6, 77.5, 66.2, 61.1.

GC-MS (*m/z*): 118 for C<sub>4</sub>H<sub>6</sub>O<sub>4</sub>.

#### Product 19.

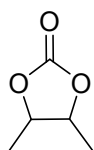

<sup>1</sup>H NMR (CDCl<sub>3</sub>, 400 MHz) cis-isomer: δ 4.89-4.78 (m, 2H), 1.39-1.33 (m, 6H); trans-isomer: δ 4.27-4.37 (m, 2H), 1.48-1.43 (m, 6H).

<sup>13</sup>C {<sup>1</sup>H} NMR (CDCl<sub>3</sub>, 100 MHz) δ 154.6, 79.9, 76.0, 18.4, 14.4.

GC-MS (*m/z*): 116 for C<sub>5</sub>H<sub>8</sub>O<sub>3</sub>.

#### Product 20.

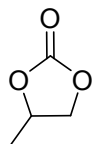

<sup>1</sup>H NMR (CDCl<sub>3</sub>, 400 MHz) δ 4.90-4.80 (m, 1H), 4.55 (dd, *J* = 8.8 Hz, 7.7 Hz, 1H), 4.02 (dd, *J* = 8.7 Hz, 7.3 Hz, 1H), 1.49 (t, *J* = 6.3 Hz, 1H).

<sup>13</sup>C {<sup>1</sup>H} NMR (CDCl<sub>3</sub>, 100 MHz) δ 155.0, 73.5, 70.6, 19.5.

GC-MS (*m/z*): 102 for C<sub>4</sub>H<sub>6</sub>O<sub>3</sub>.

#### Product 21.

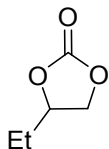

<sup>1</sup>H NMR (CDCl<sub>3</sub>, 400 MHz) δ 4.70-4.62 (m, 1H), 4.52 (t, *J* = 8.2 Hz, 1H), 4.08 (dd, *J* = 8.4 Hz, 7.0 Hz, 1H), 1.90-1.70 (m, 1H), 1.04 (t, *J* = 7.4 Hz, 3H).

<sup>13</sup>C {<sup>1</sup>H} NMR (CDCl<sub>3</sub>, 100 MHz) δ 155.1, 78.0, 69.0, 27.0, 8.5.

GC-MS (*m/z*): 116 for C<sub>5</sub>H<sub>8</sub>O<sub>3</sub>.



Product 22.

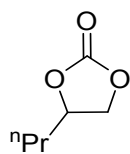

$^1\text{H}$  NMR ( $\text{CDCl}_3$ , 400 MHz)  $\delta$  4.75-4.67 (m, 1H), 4.52 (t,  $J = 8.3$  Hz, 1H), 4.06 (dd,  $J = 8.7$  Hz, 7.3 Hz, 1H), 1.86-1.76 (m, 1H), 1.71-1.60 (m, 1H), 1.56-1.35 (m, 1H), 0.99 (t,  $J = 7.5$  Hz, 3H).

$^{13}\text{C}\{^1\text{H}\}$  NMR ( $\text{CDCl}_3$ , 100 MHz)  $\delta$  155.1, 69.4, 35.9, 17.8, 13.6.

GC-MS ( $m/z$ ): 131 for  $\text{C}_6\text{H}_{10}\text{O}_3$ .

Product 23.

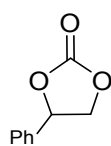

$^1\text{H}$  NMR ( $\text{CDCl}_3$ , 400 MHz)  $\delta$  7.48-7.41 (m, 3H), 7.38-7.34 (m, 2H), 5.68 (dd,  $J = 8.0$  Hz, 8.8 Hz, 1H), 4.80 (dd,  $J = 8.4$  Hz, 9.4 Hz, 1H), 4.35 (dd,  $J = 8.0$  Hz, 8.8 Hz, 1H).

$^{13}\text{C}\{^1\text{H}\}$  NMR ( $\text{CDCl}_3$ , 100 MHz)  $\delta$  154.8, 135.8, 129.8, 129.3, 125.9, 78.0, 71.2.

GC-MS ( $m/z$ ): 164 for  $\text{C}_9\text{H}_8\text{O}_3$

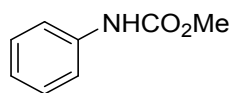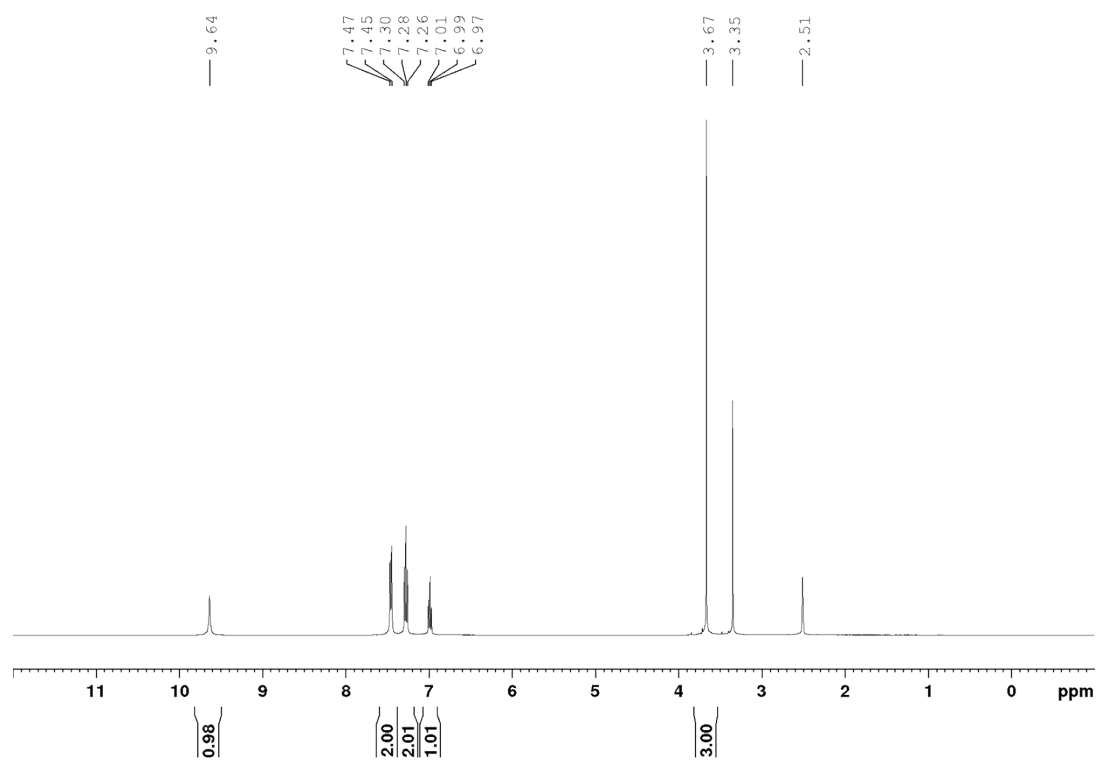

Figure S1.  $^1\text{H}$  NMR (400 MHz,  $\text{DMSO-}d_6$ ) of product **1**.

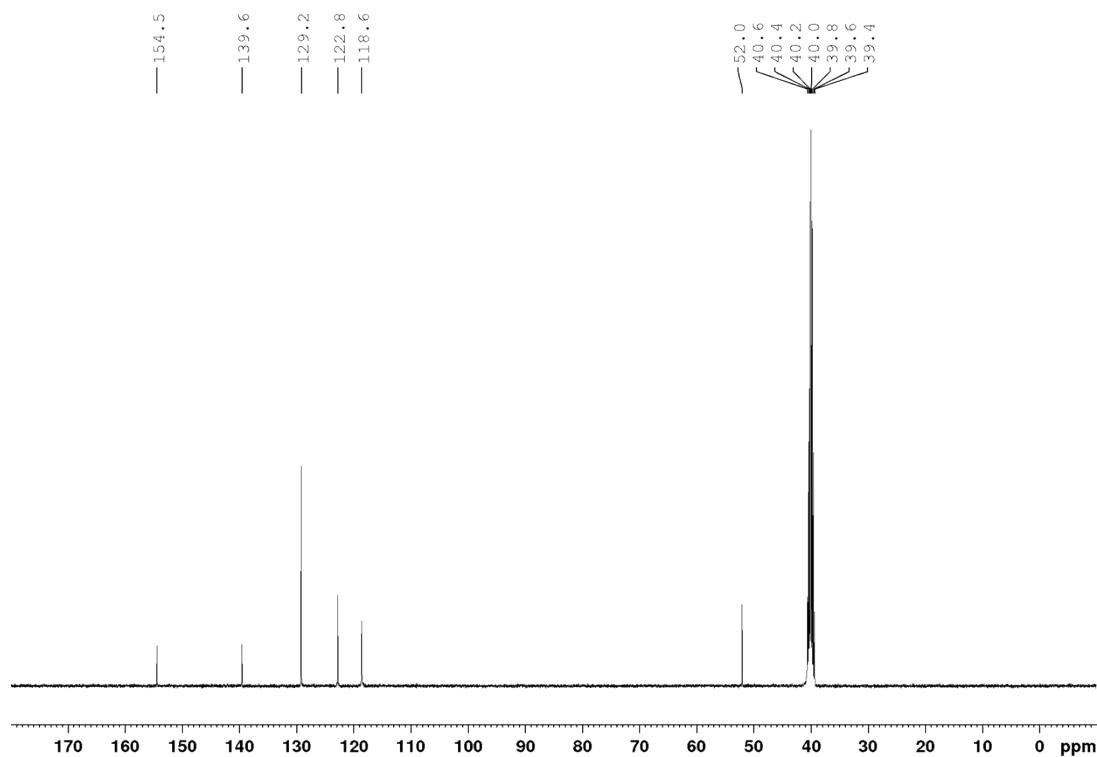

Figure S2.  $^{13}\text{C}\{^1\text{H}\}$  NMR (100 MHz,  $\text{DMSO-}d_6$ ) of product **1**.

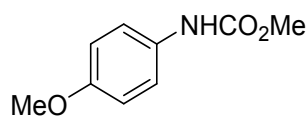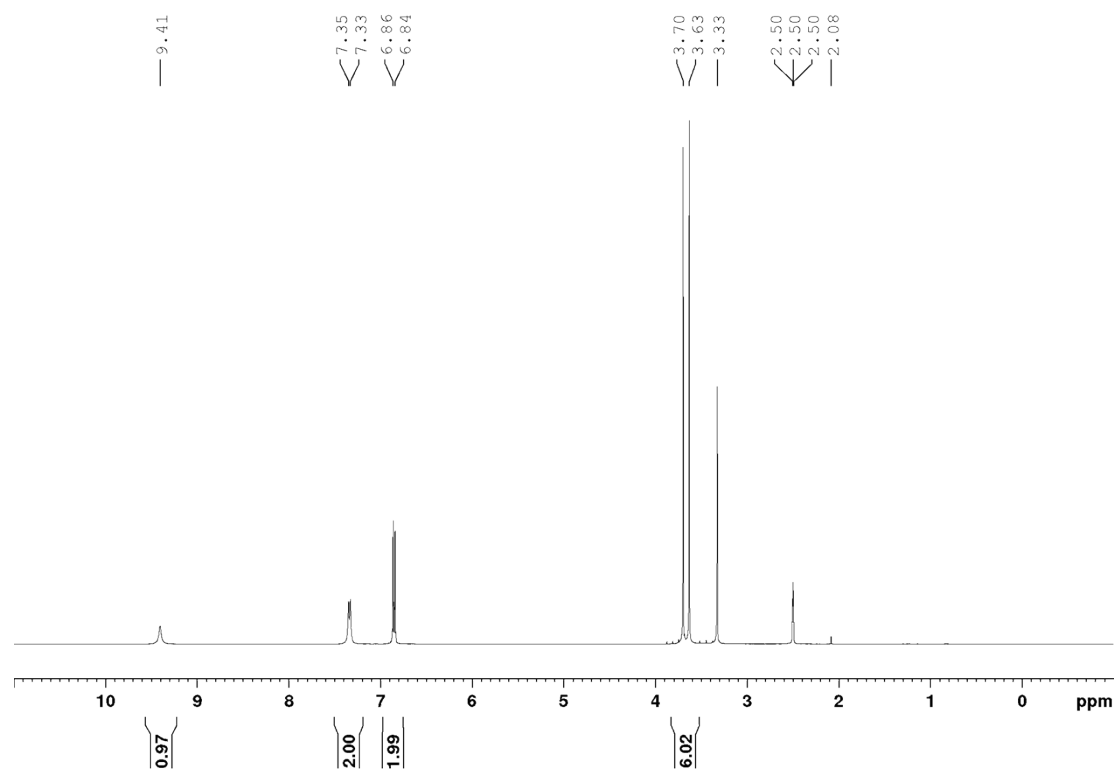

Figure S3.  $^1\text{H}$  NMR (400 MHz,  $\text{DMSO-}d_6$ ) of product **2**.

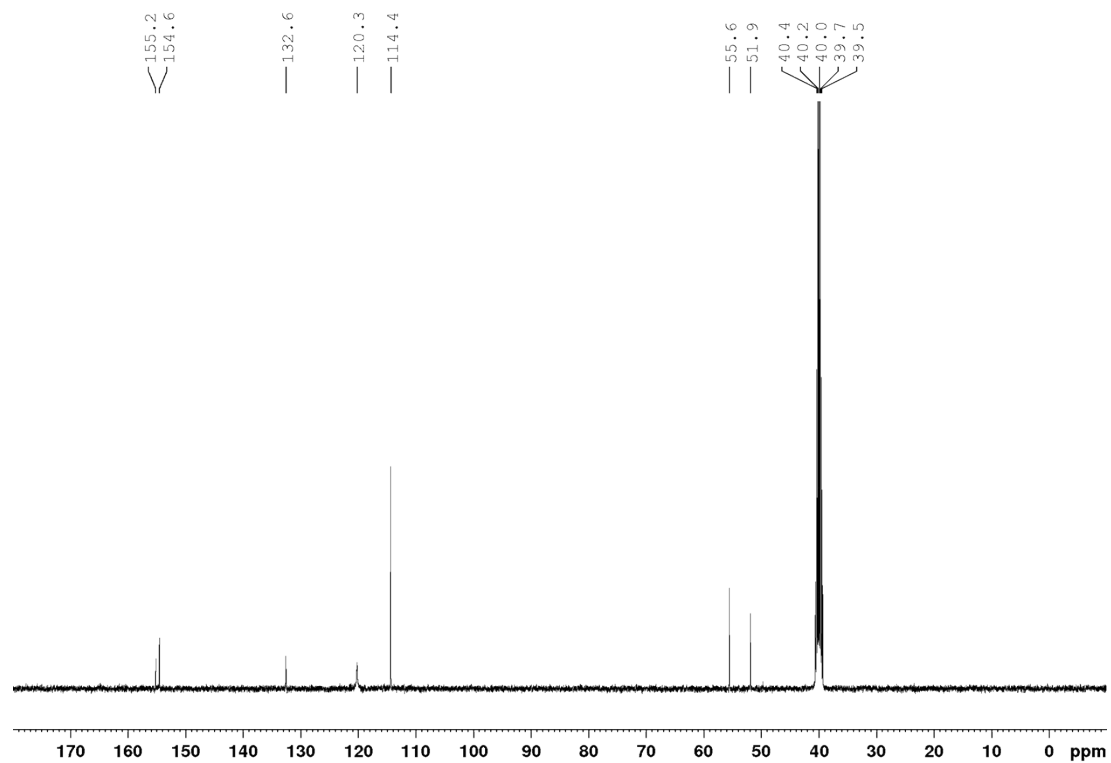

Figure S4.  $^{13}\text{C}\{^1\text{H}\}$  NMR (100 MHz,  $\text{DMSO-}d_6$ ) of product **2**.

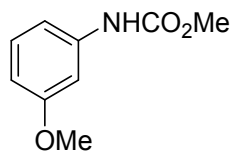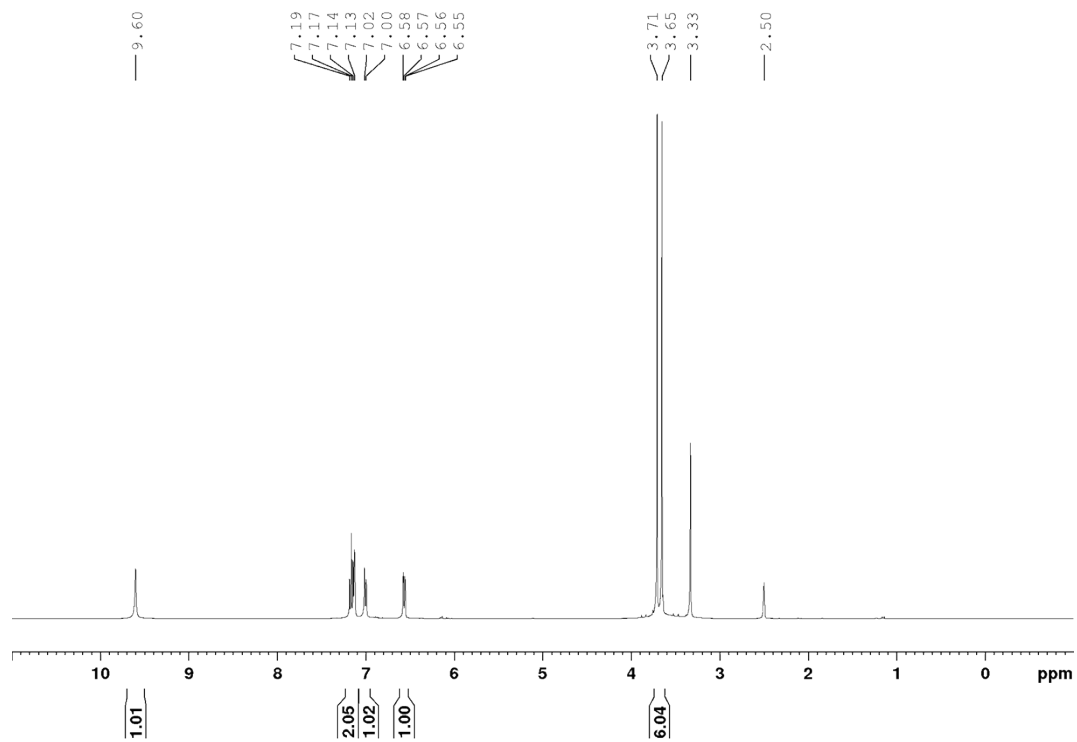

Figure S5. <sup>1</sup>H NMR (400 MHz, DMSO-*d*<sub>6</sub>) of product 3.

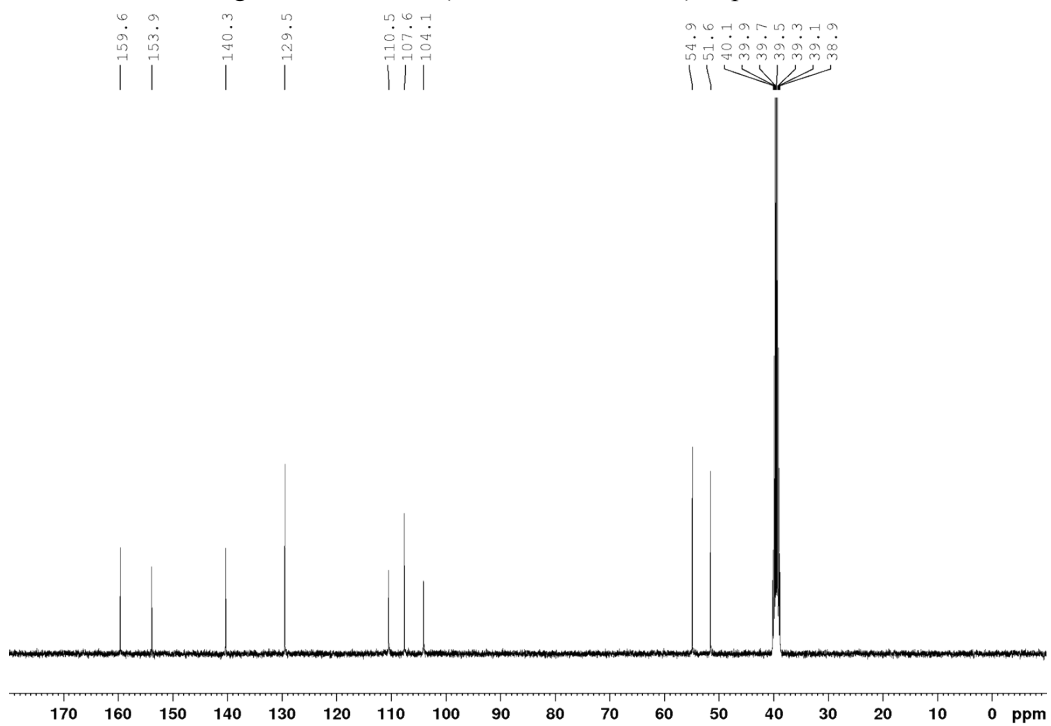

Figure S6. <sup>13</sup>C{<sup>1</sup>H} NMR (100 MHz, DMSO-*d*<sub>6</sub>) of product 3.

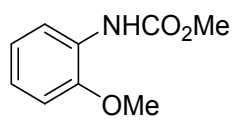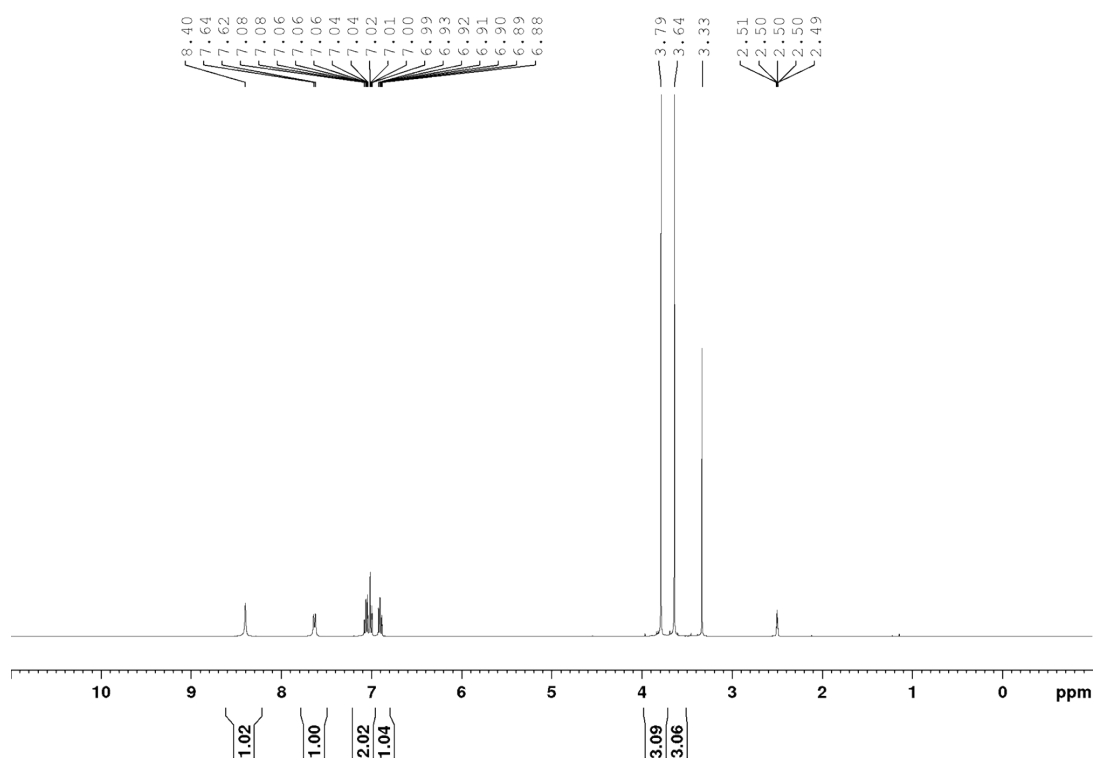

Figure S7. <sup>1</sup>H NMR (400 MHz, DMSO-*d*<sub>6</sub>) of product 4.

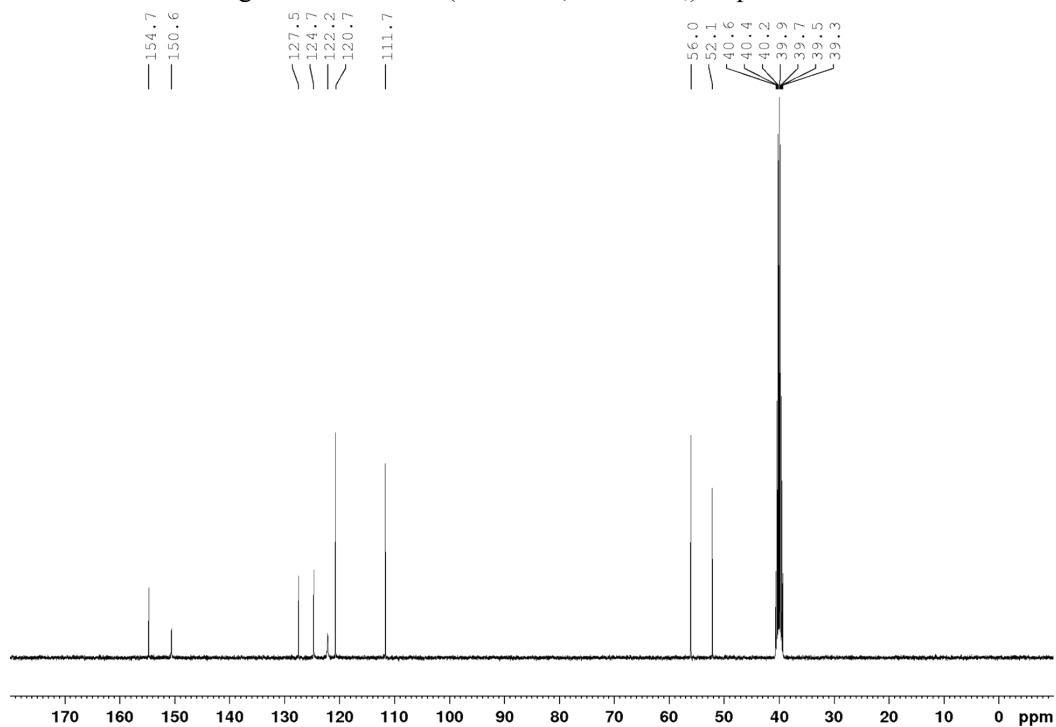

Figure S8. <sup>13</sup>C{<sup>1</sup>H} NMR (100 MHz, DMSO-*d*<sub>6</sub>) of product 4.

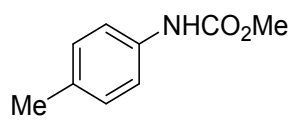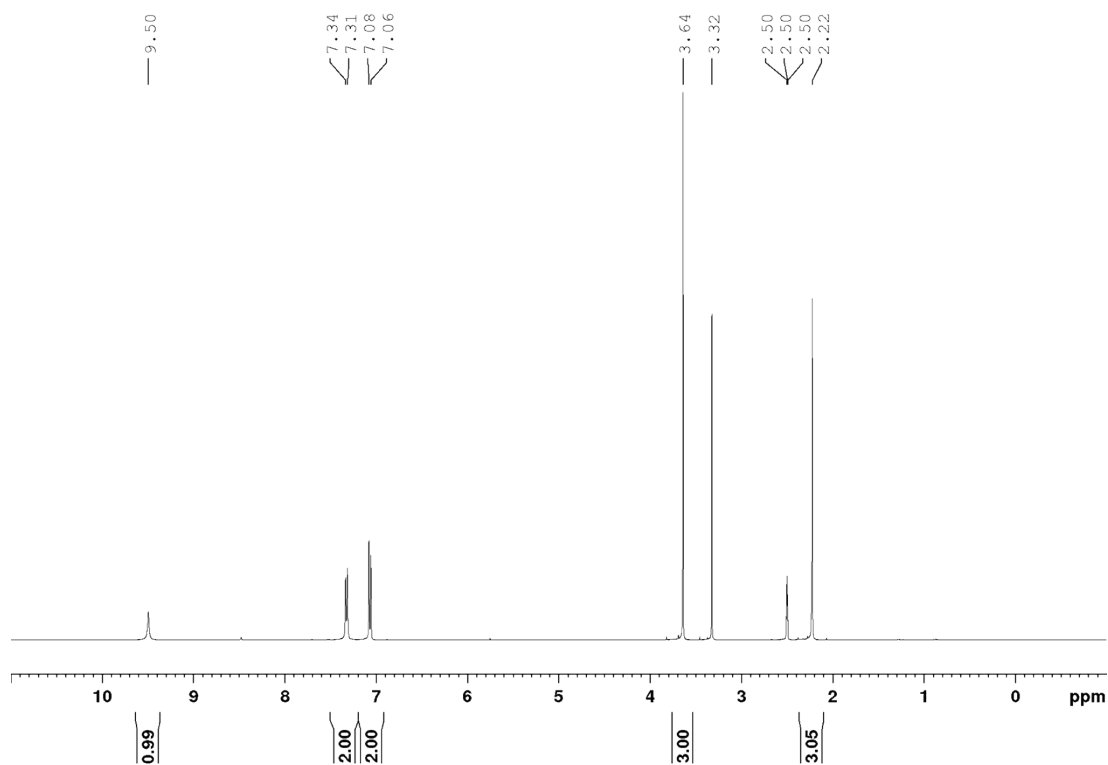

Figure S9. <sup>1</sup>H NMR (400 MHz, DMSO-*d*<sub>6</sub>) of product 5.

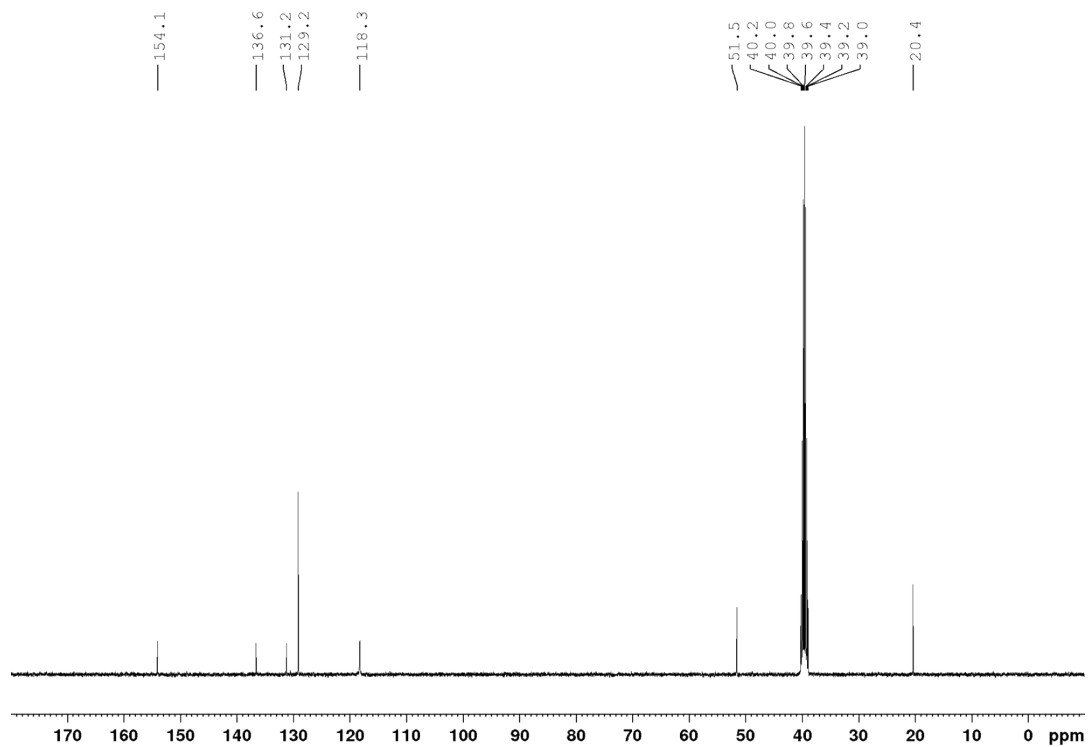

Figure S10. <sup>13</sup>C{<sup>1</sup>H} NMR (100 MHz, DMSO-*d*<sub>6</sub>) of product 5.

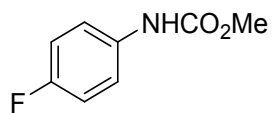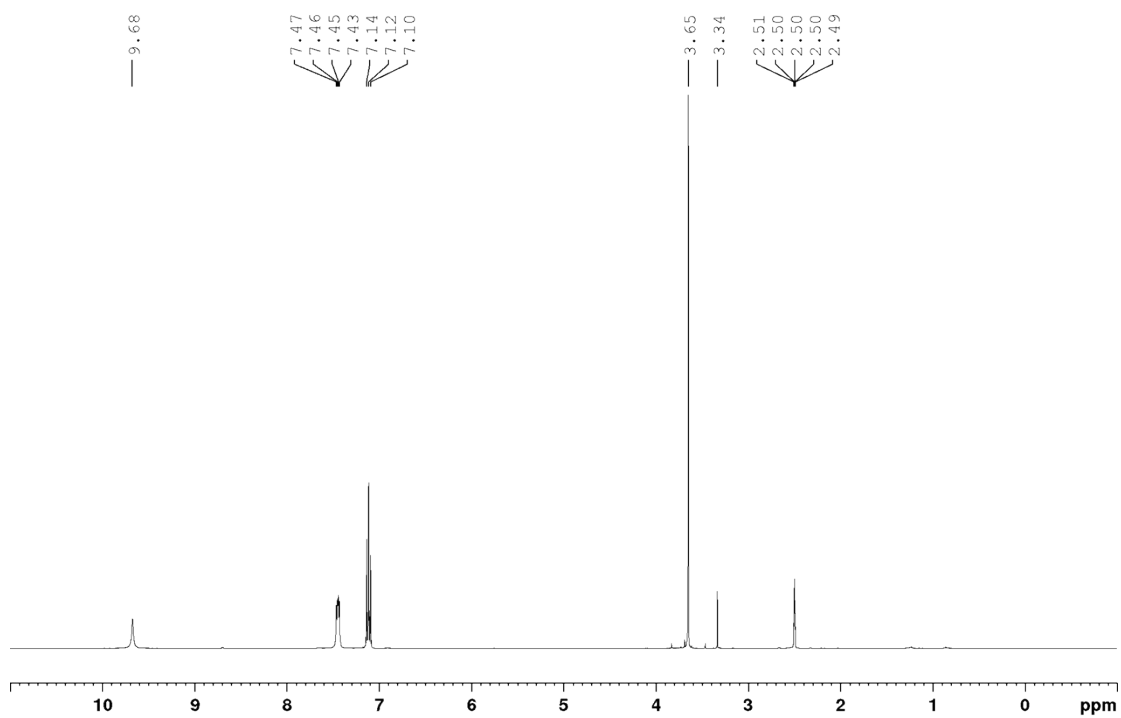

Figure S11.  $^1\text{H}$  NMR (400 MHz,  $\text{DMSO-}d_6$ ) of product **6**.

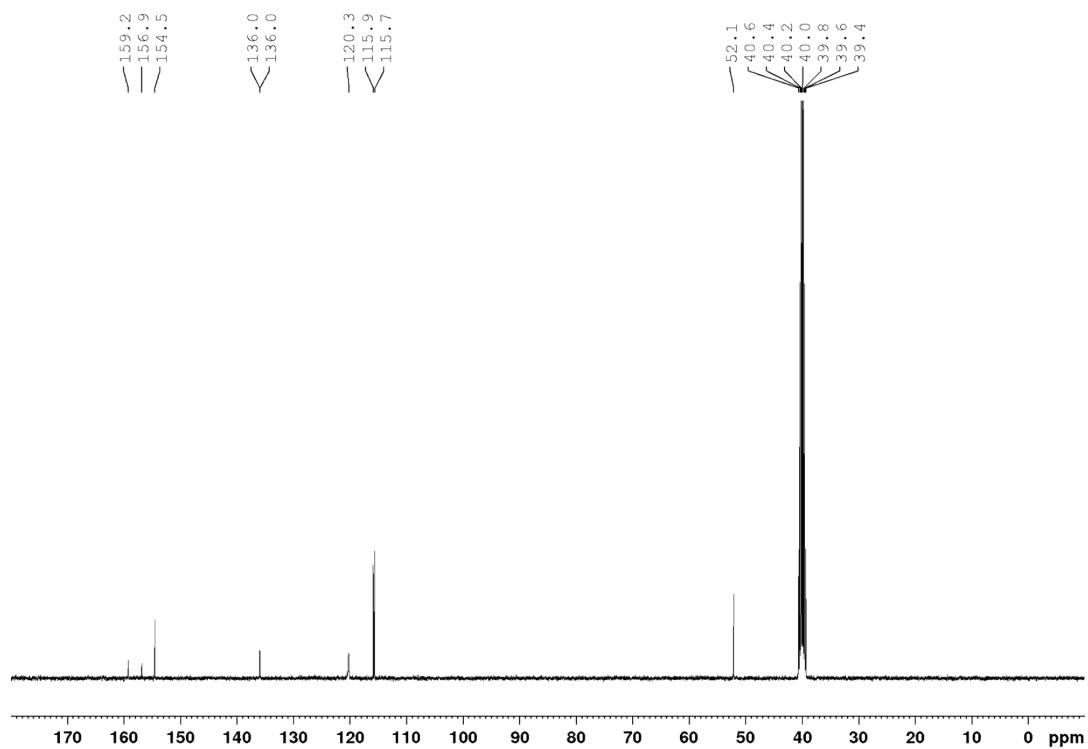

Figure S12.  $^{13}\text{C}\{^1\text{H}\}$  NMR (100 MHz,  $\text{DMSO-}d_6$ ) of product **6**.

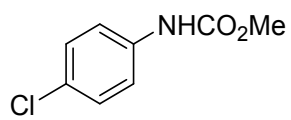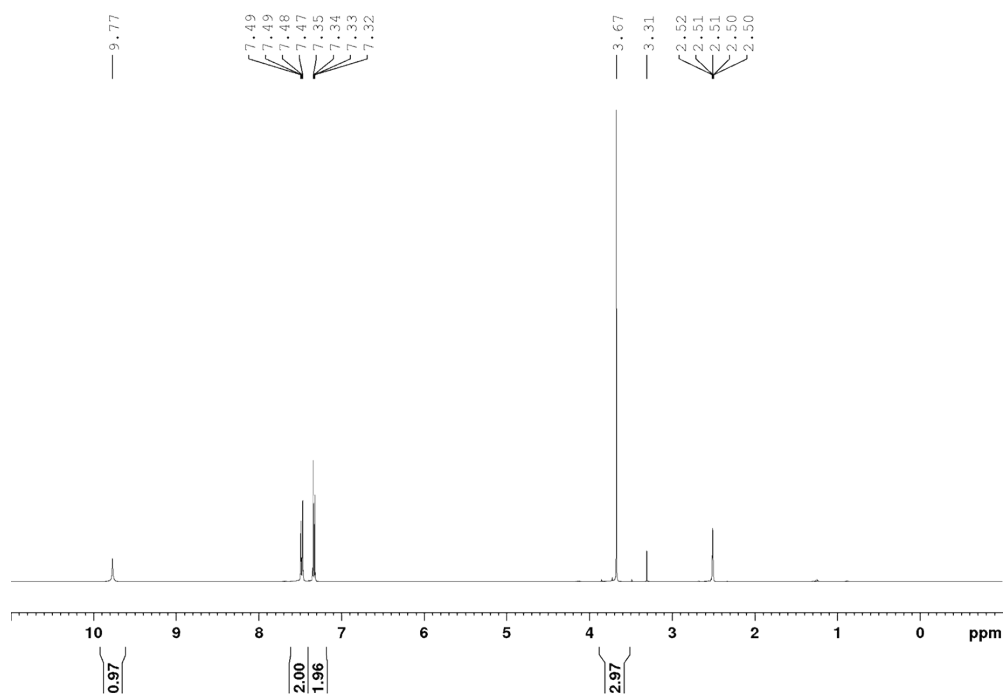

Figure S13.  $^1\text{H NMR}$  (400 MHz,  $\text{DMSO-}d_6$ ) of product 7.

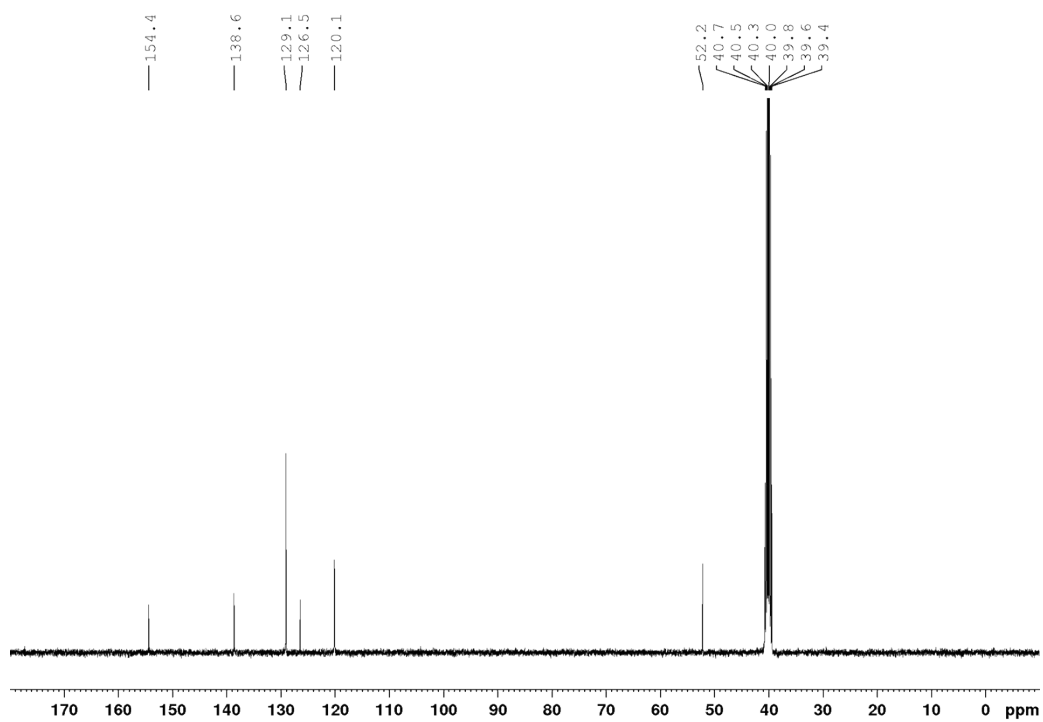

Figure S14.  $^{13}\text{C}\{^1\text{H}\}$  NMR (100 MHz,  $\text{DMSO-}d_6$ ) of product 7.



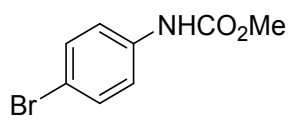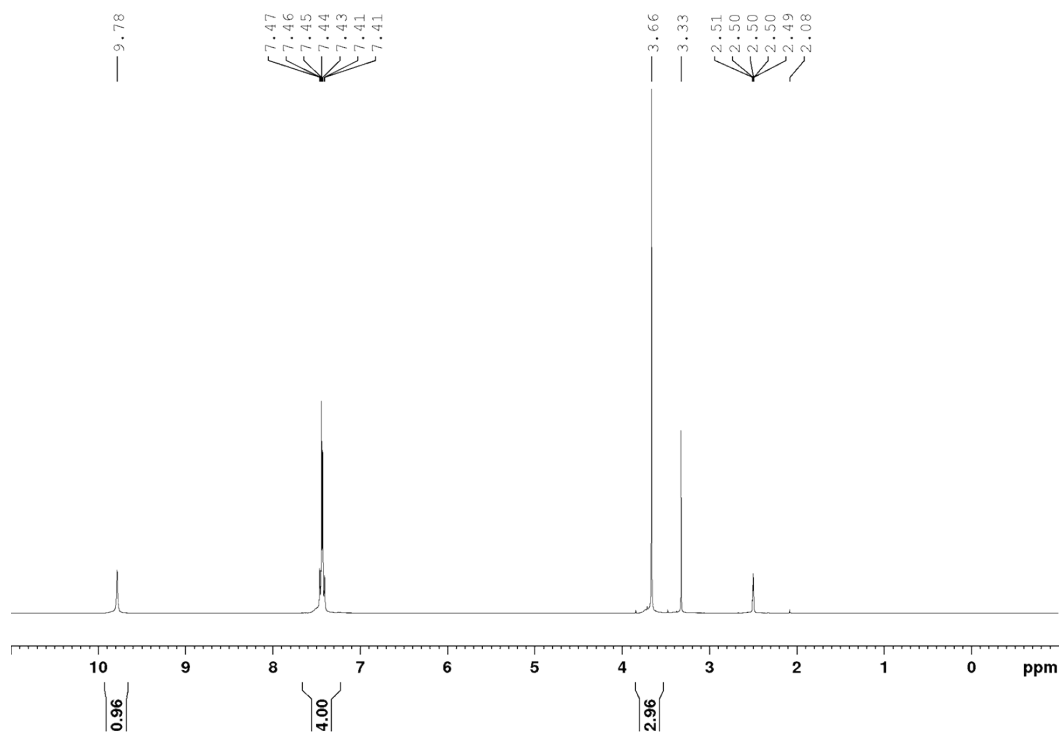

Figure S15.  $^1\text{H}$  NMR (400 MHz,  $\text{DMSO-}d_6$ ) of product **8**.

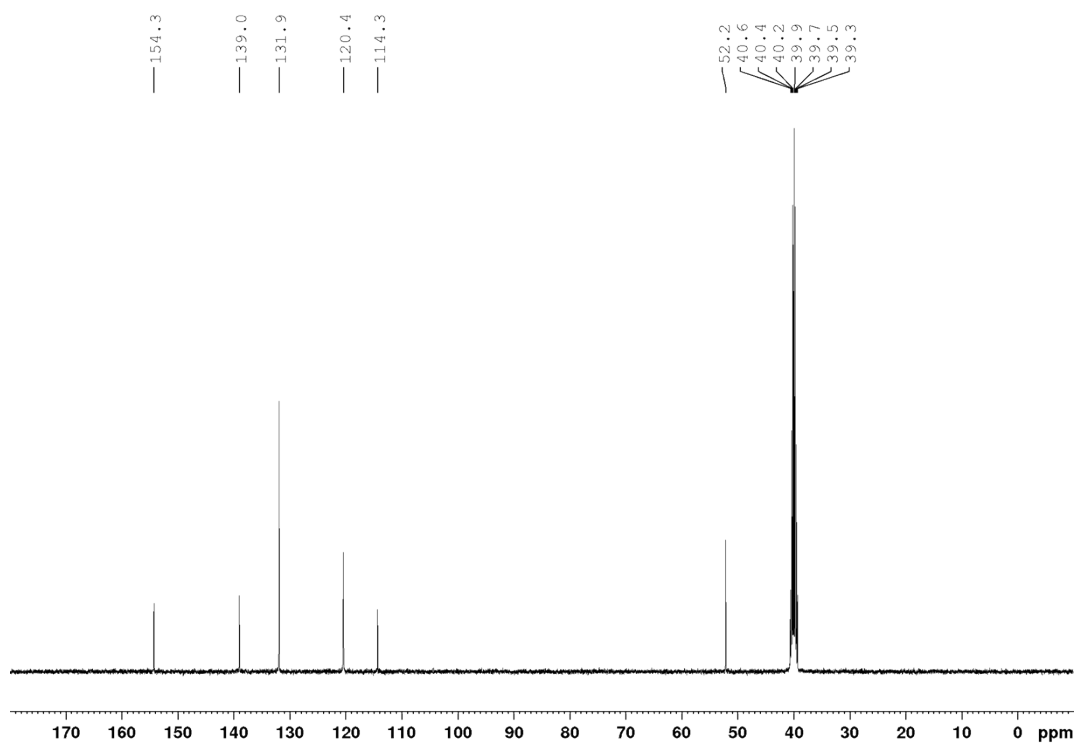

Figure S16.  $^{13}\text{C}\{^1\text{H}\}$  NMR (100 MHz,  $\text{DMSO-}d_6$ ) of product **8**.

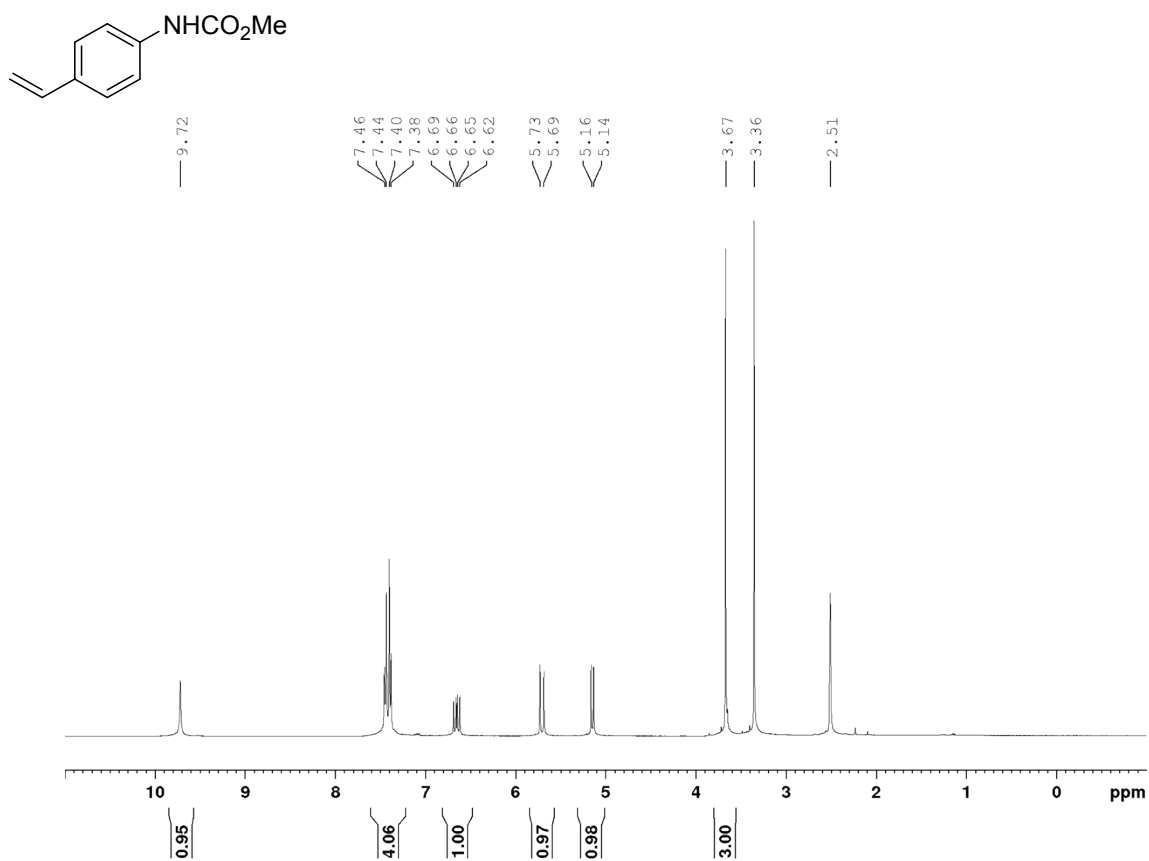

Figure S17.  $^1\text{H NMR}$  (400 MHz,  $\text{DMSO-}d_6$ ) of product **9**.

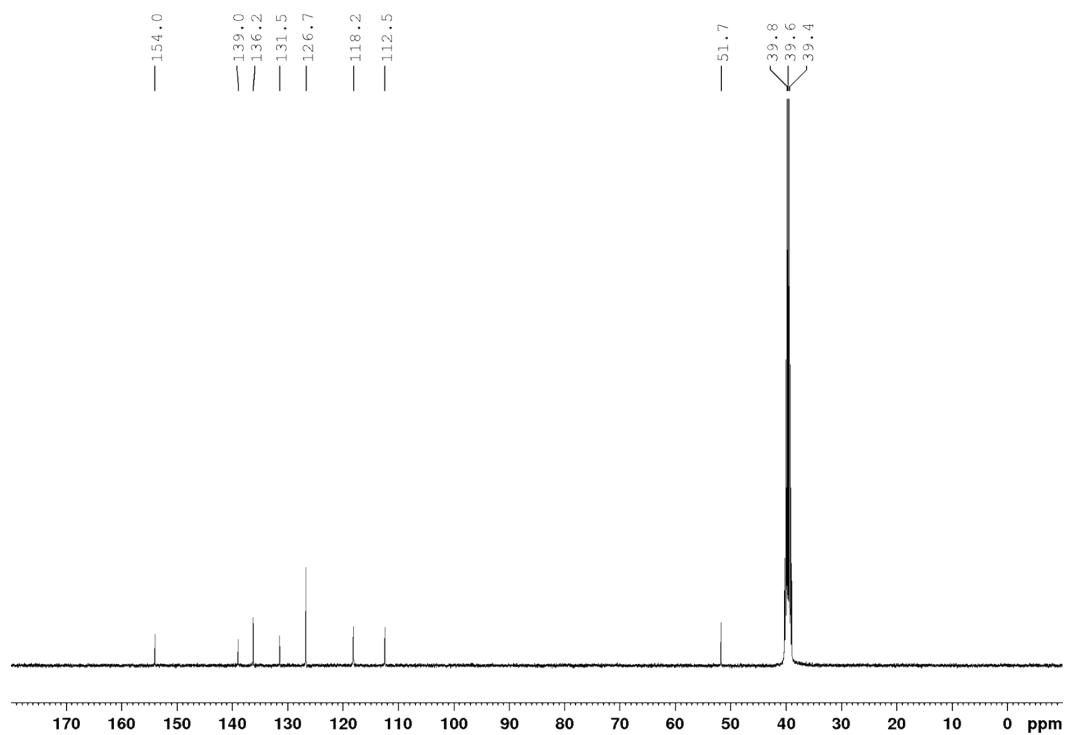

Figure S18.  $^{13}\text{C}\{^1\text{H}\}$  NMR (100 MHz,  $\text{DMSO-}d_6$ ) of product **9**.

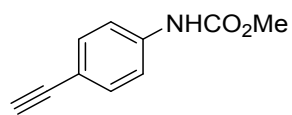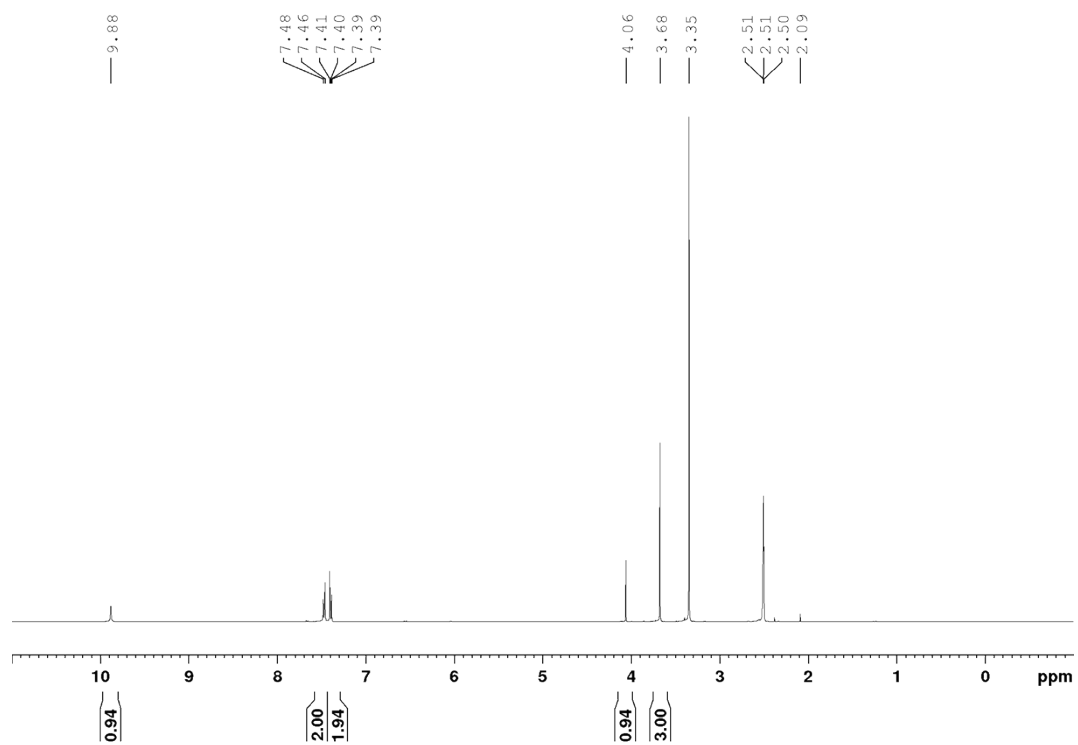

Figure S19.  $^1\text{H}$  NMR (400 MHz,  $\text{DMSO-}d_6$ ) of product **10**.

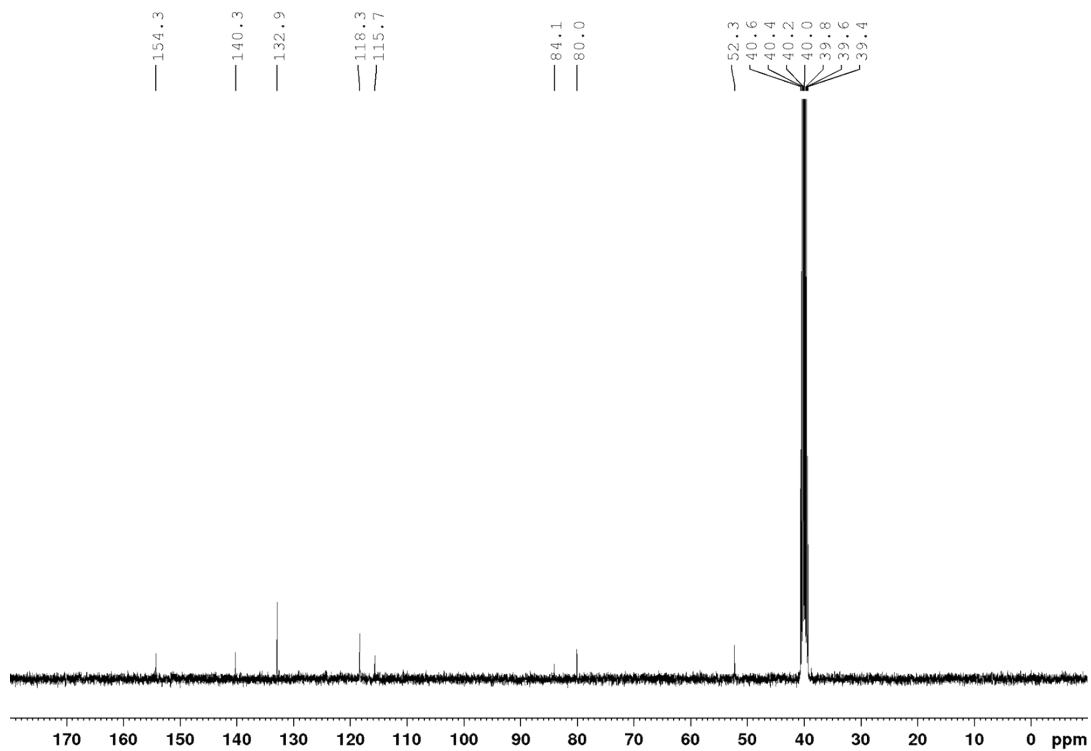

Figure S20.  $^{13}\text{C}\{^1\text{H}\}$  NMR (100 MHz,  $\text{DMSO-}d_6$ ) of product **10**.

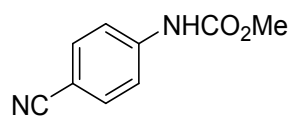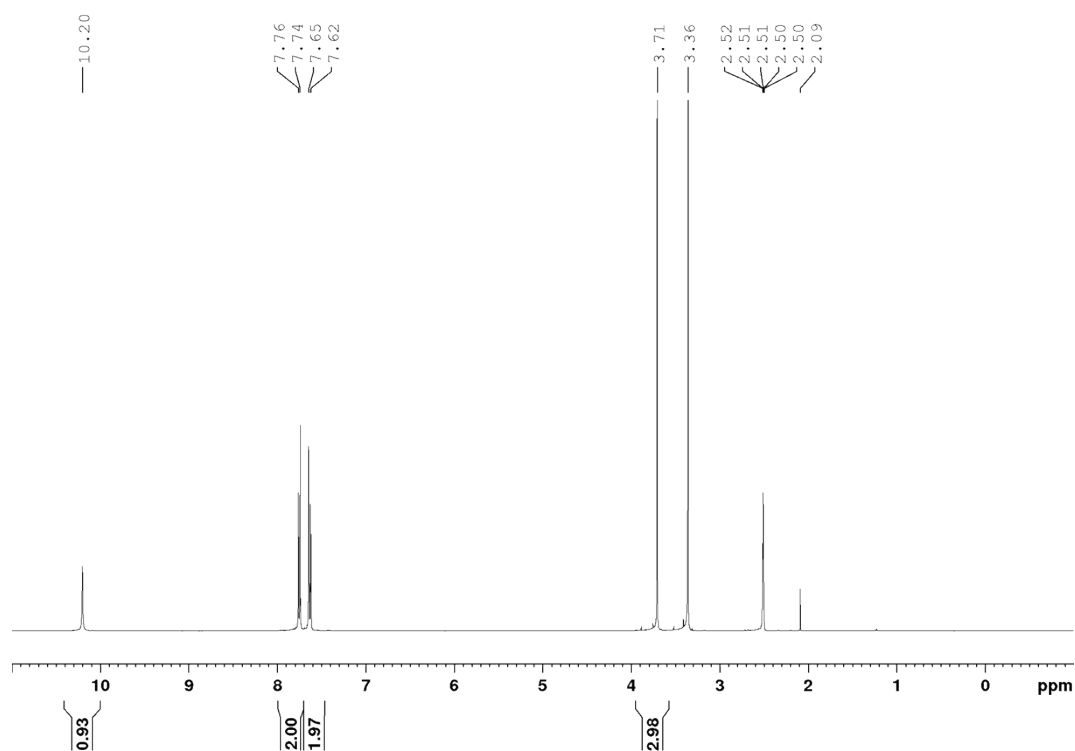

Figure S21. <sup>1</sup>H NMR (400 MHz, DMSO-*d*<sub>6</sub>) of product 11.

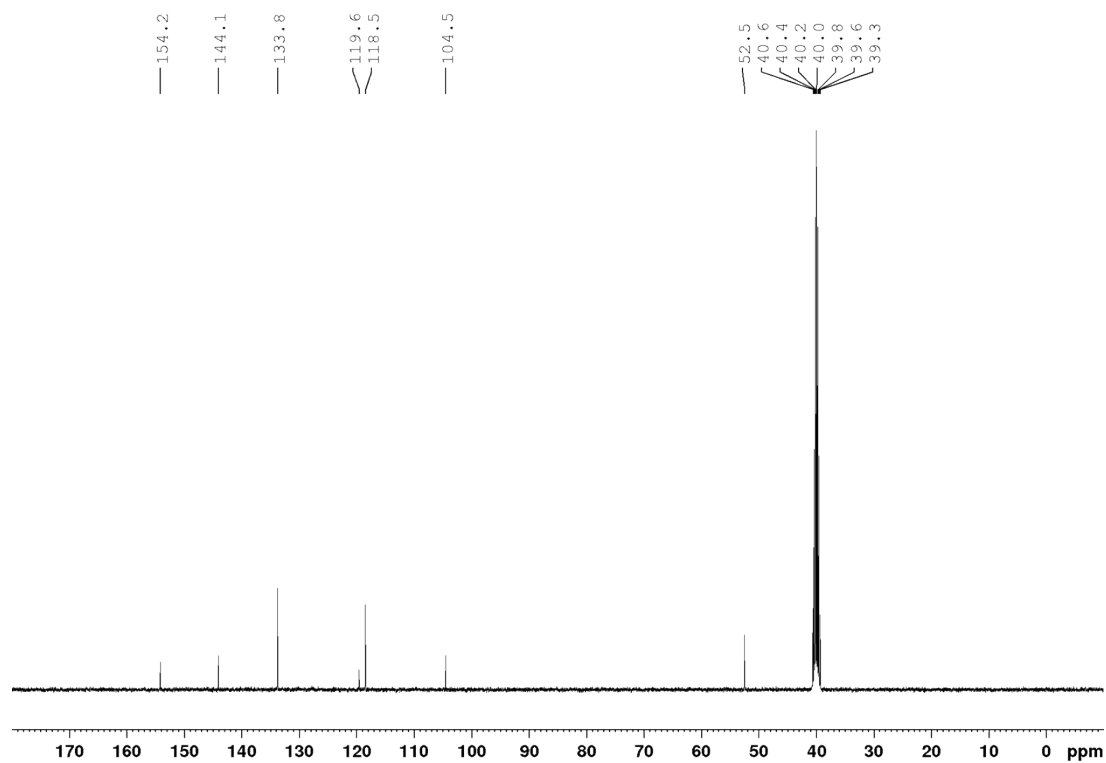

Figure S22. <sup>13</sup>C{<sup>1</sup>H} NMR (100 MHz, DMSO-*d*<sub>6</sub>) of product 11.

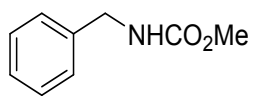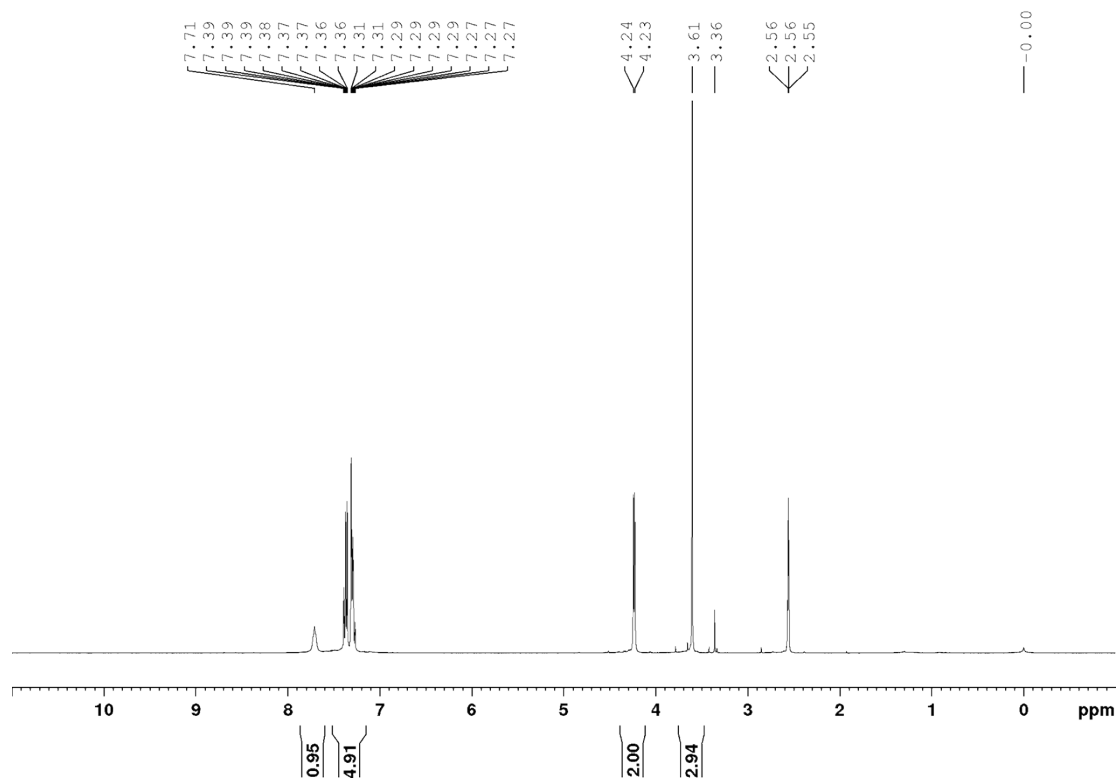

Figure S23.  $^1\text{H}$  NMR (400 MHz,  $\text{DMSO-}d_6$ ) of product **12**.

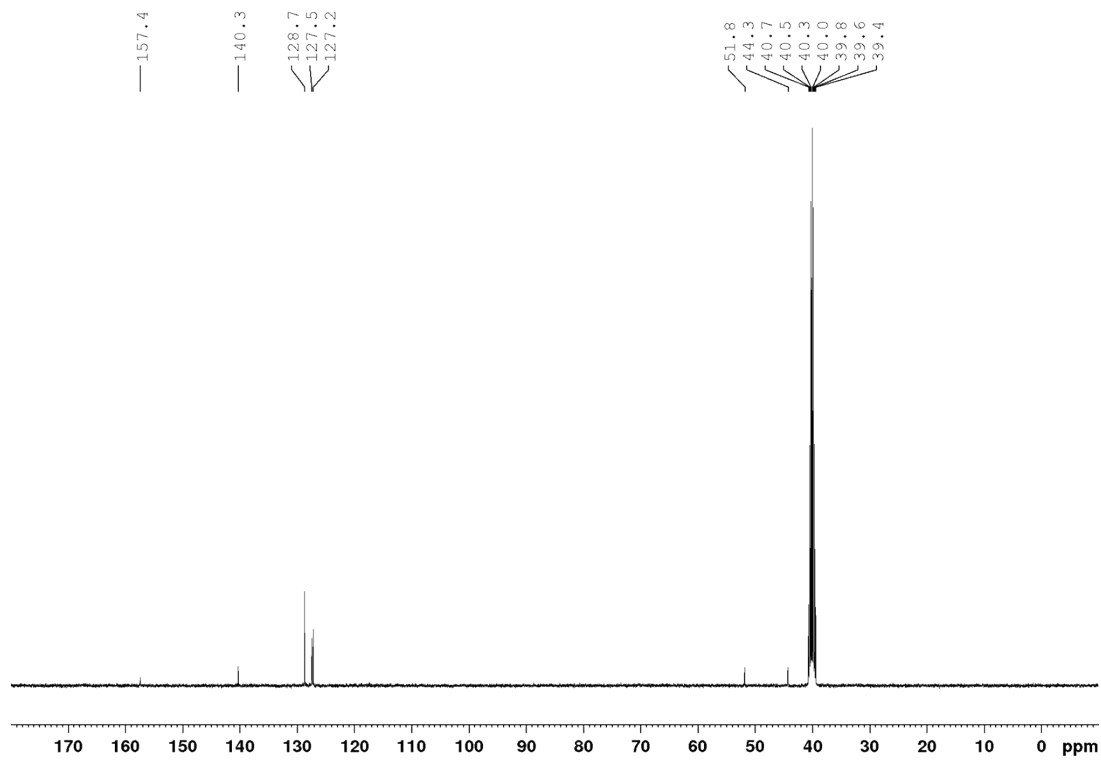

Figure S24.  $^{13}\text{C}\{^1\text{H}\}$  NMR (100 MHz,  $\text{DMSO-}d_6$ ) of product **12**.

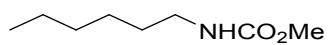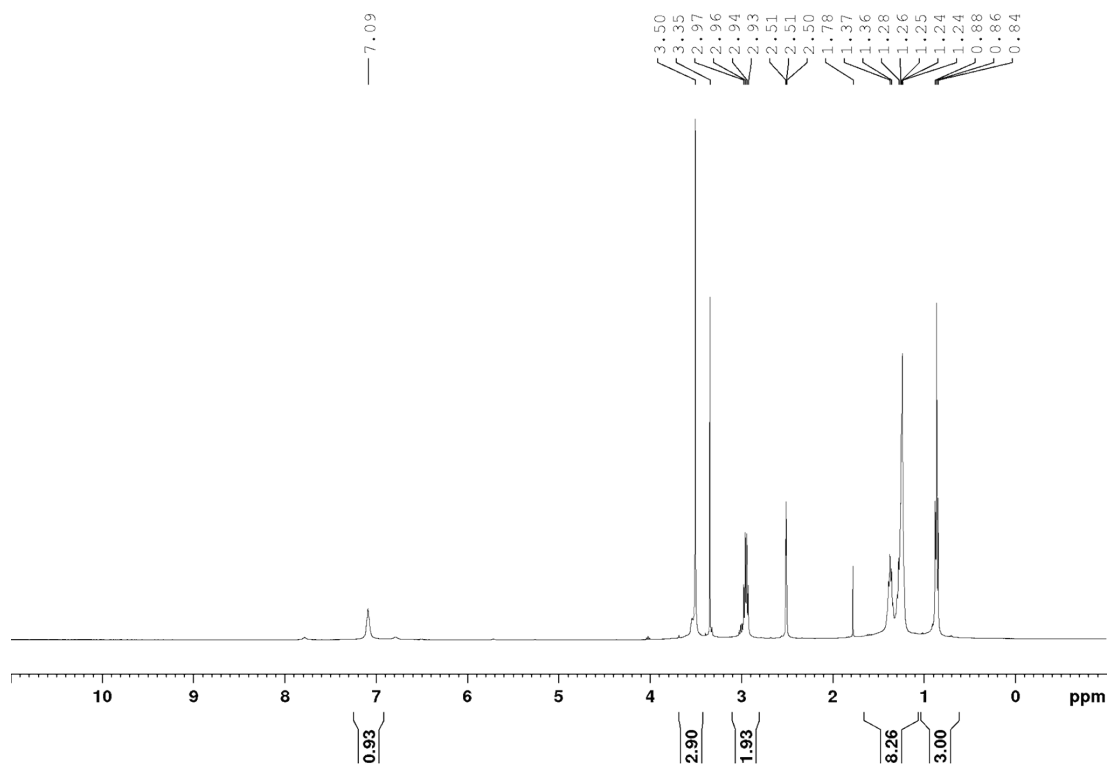

Figure S25.  $^1\text{H}$  NMR (400 MHz,  $\text{DMSO-}d_6$ ) of product **13**.

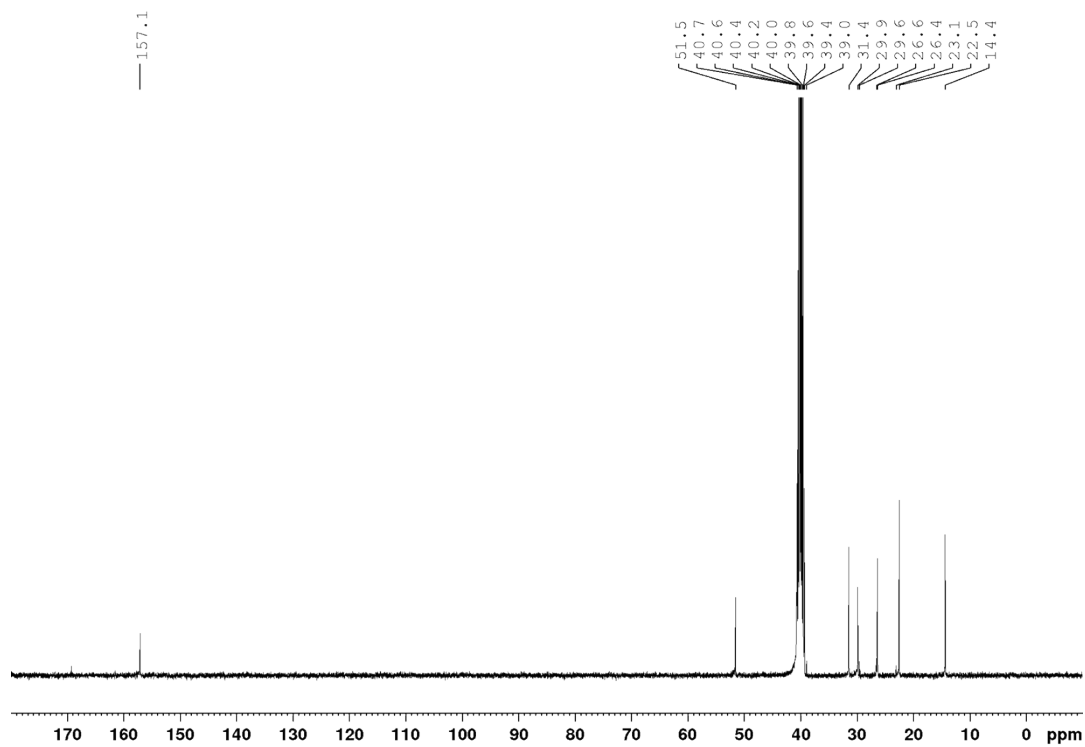

Figure S26.  $^{13}\text{C}\{^1\text{H}\}$  NMR (100 MHz,  $\text{DMSO-}d_6$ ) of product **13**.

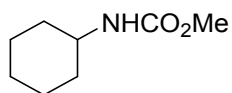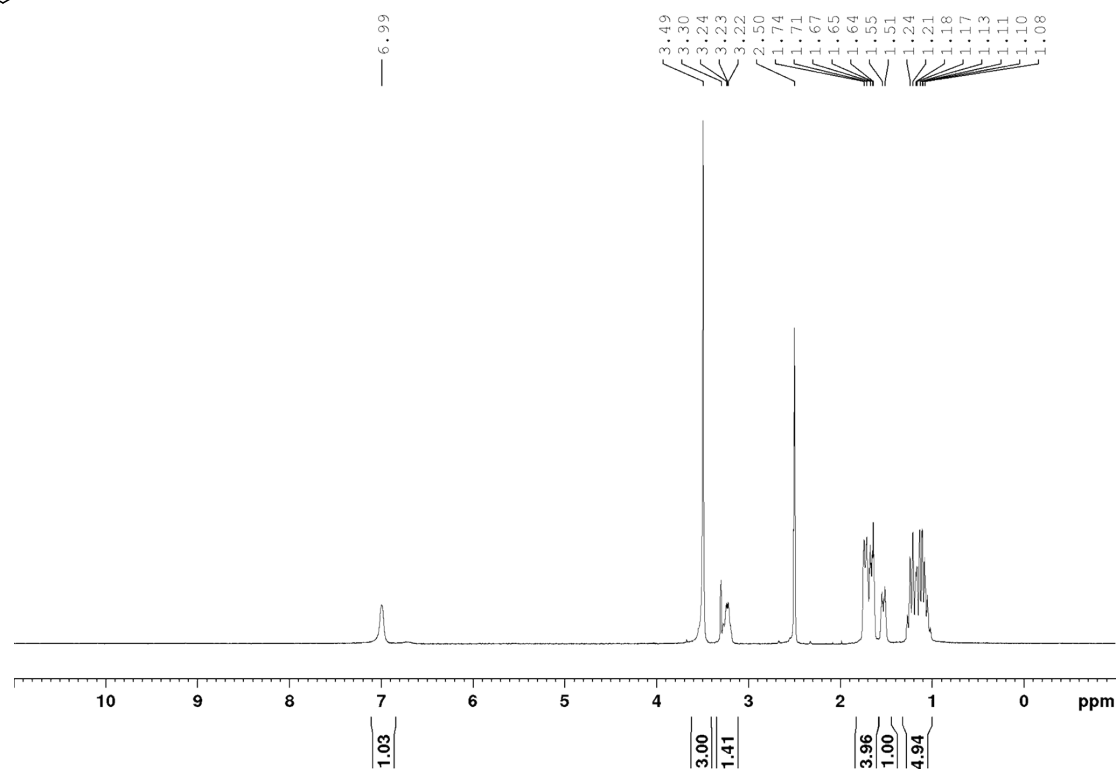

Figure S27.  $^1\text{H}$  NMR (400 MHz,  $\text{DMSO-}d_6$ ) of product **14**.

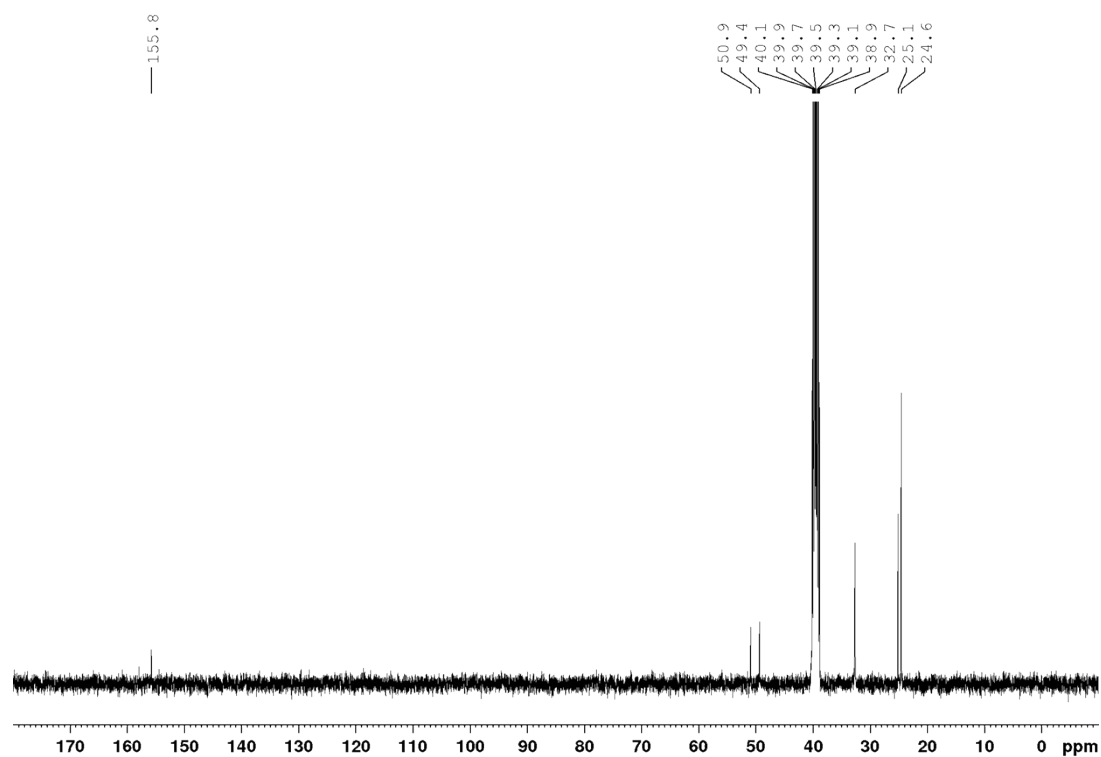

Figure S28.  $^{13}\text{C}\{^1\text{H}\}$  NMR (100 MHz,  $\text{DMSO-}d_6$ ) of product **14**.

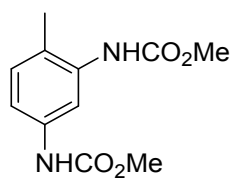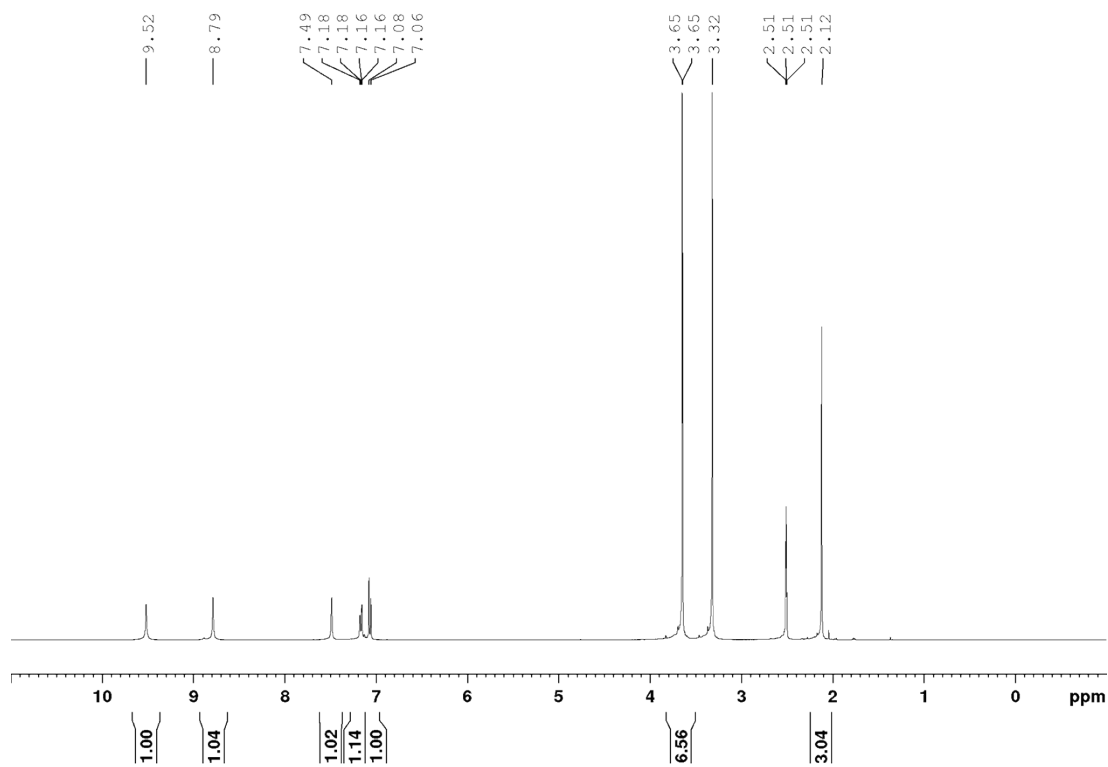

Figure S29.  $^1\text{H}$  NMR (400 MHz,  $\text{DMSO-}d_6$ ) of product **15**.

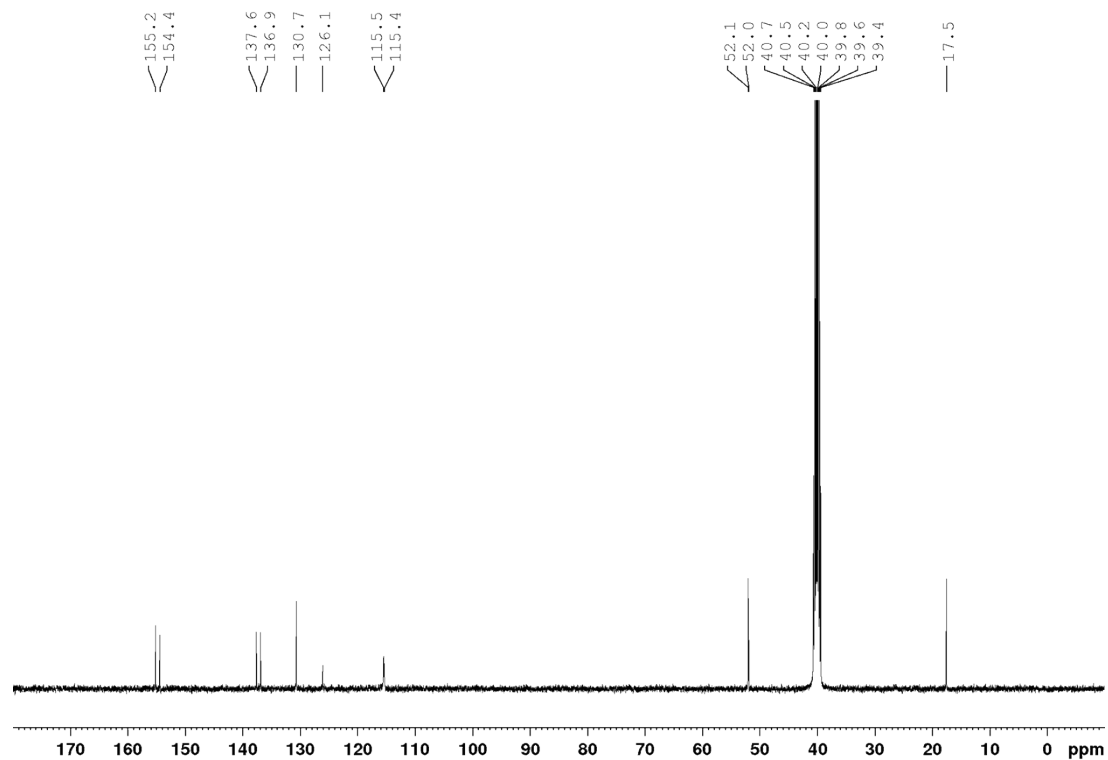

Figure S30.  $^{13}\text{C}\{^1\text{H}\}$  NMR (100 MHz,  $\text{DMSO-}d_6$ ) of product **15**.



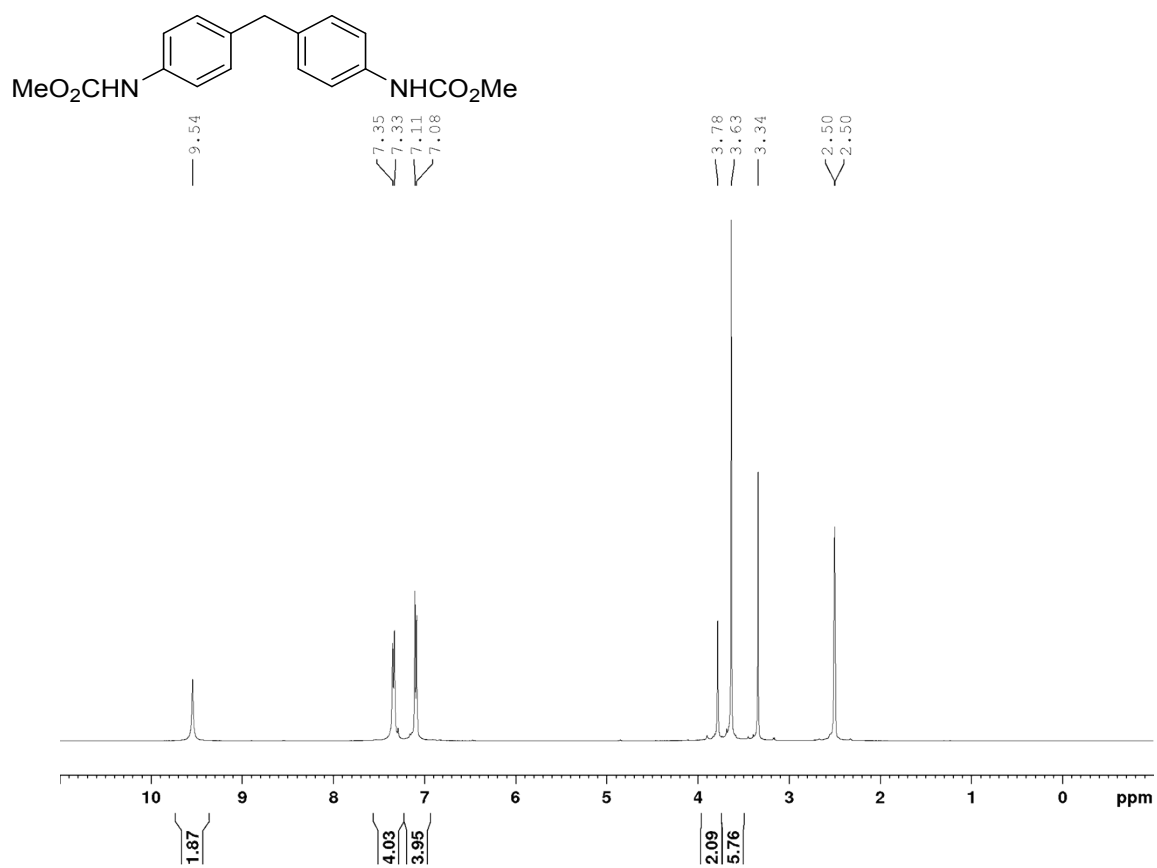

Figure S31.  $^1\text{H}$  NMR (400 MHz,  $\text{DMSO-}d_6$ ) of product **16**.

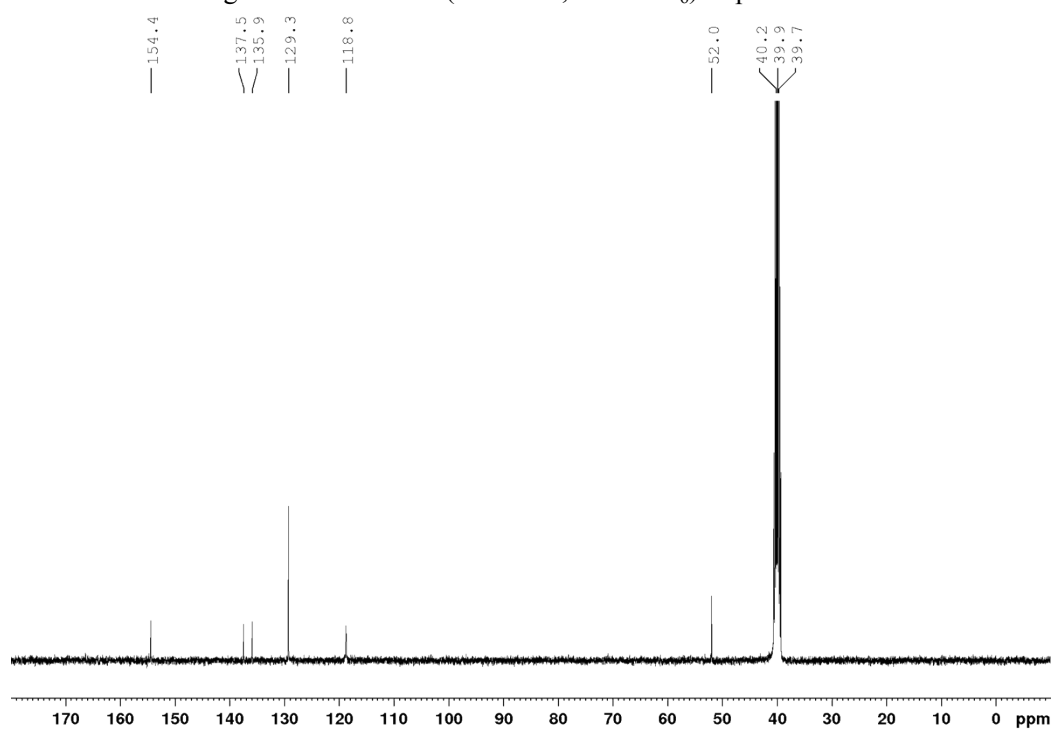

Figure S32.  $^{13}\text{C}\{^1\text{H}\}$  NMR (100 MHz,  $\text{DMSO-}d_6$ ) of product **16**.

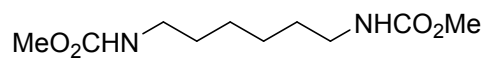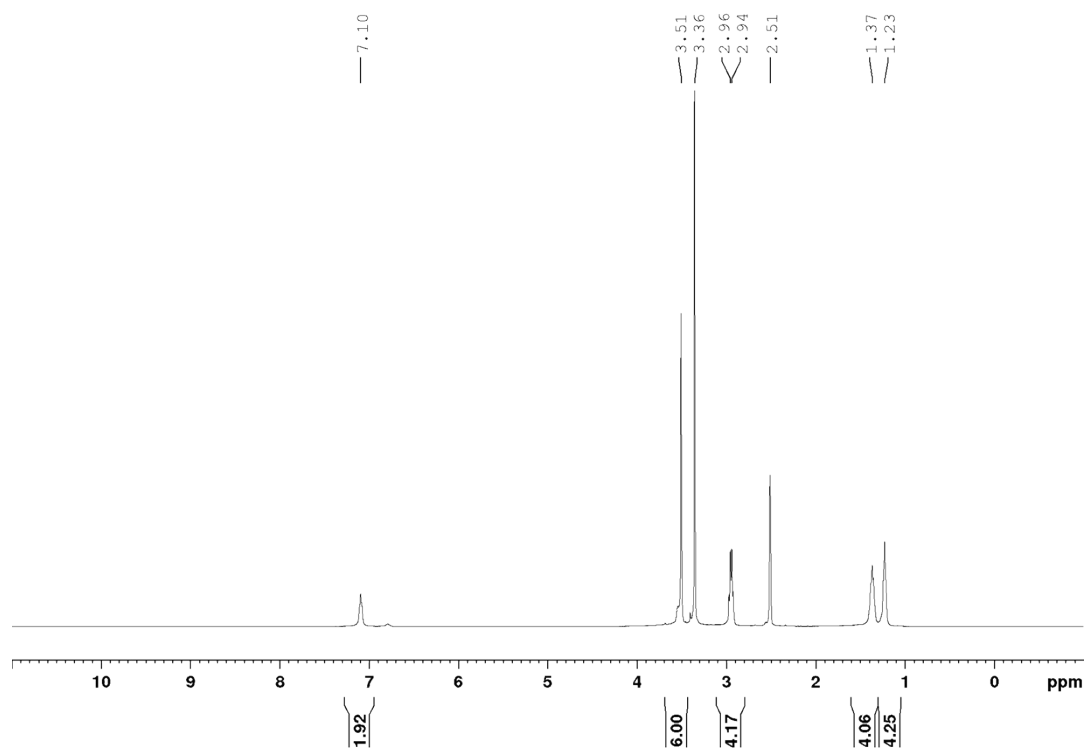

Figure S33.  $^1\text{H}$  NMR (400 MHz,  $\text{DMSO-}d_6$ ) of product **17**.

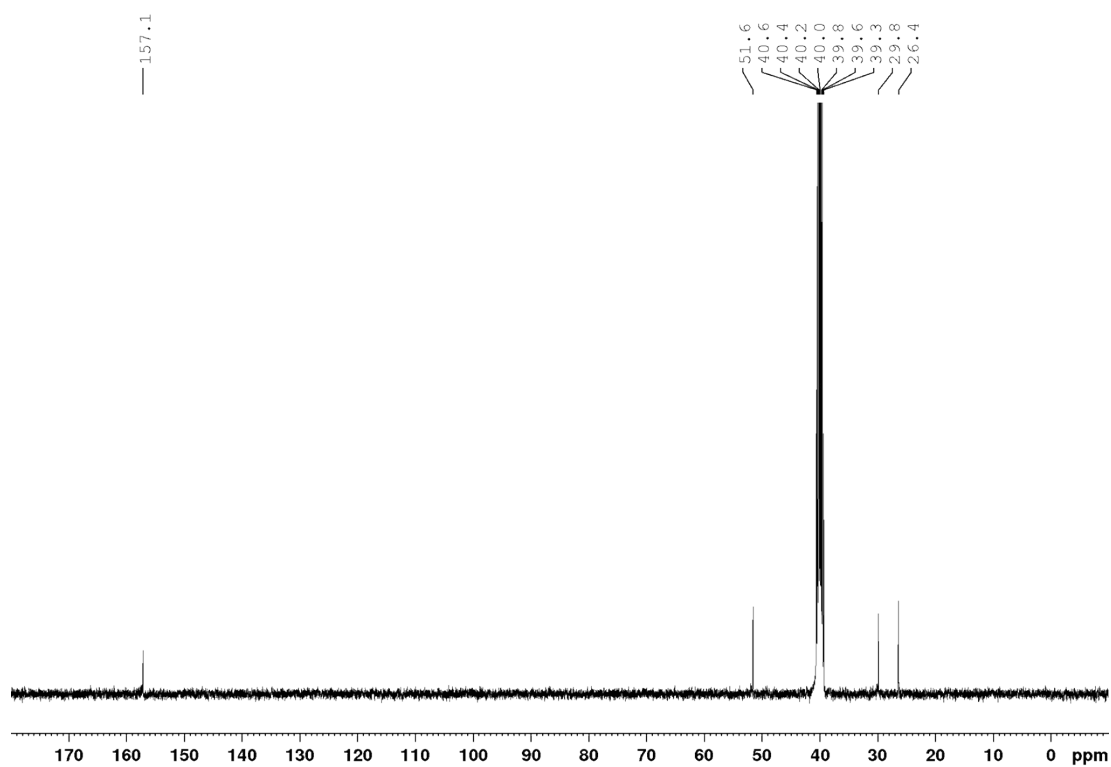

Figure S34.  $^{13}\text{C}\{^1\text{H}\}$  NMR (100 MHz,  $\text{DMSO-}d_6$ ) of product **17**.

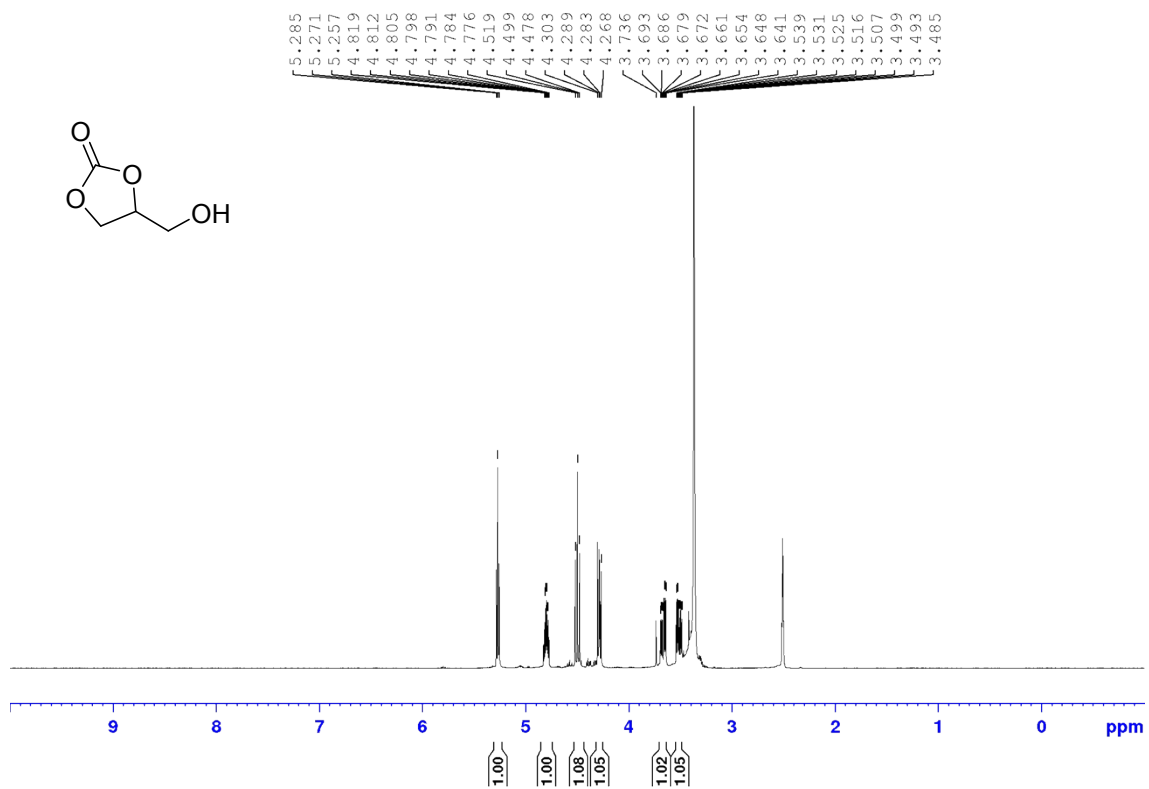

Figure S35.  $^1\text{H NMR}$  (400 MHz,  $\text{DMSO-}d_6$ ) of product **18**.

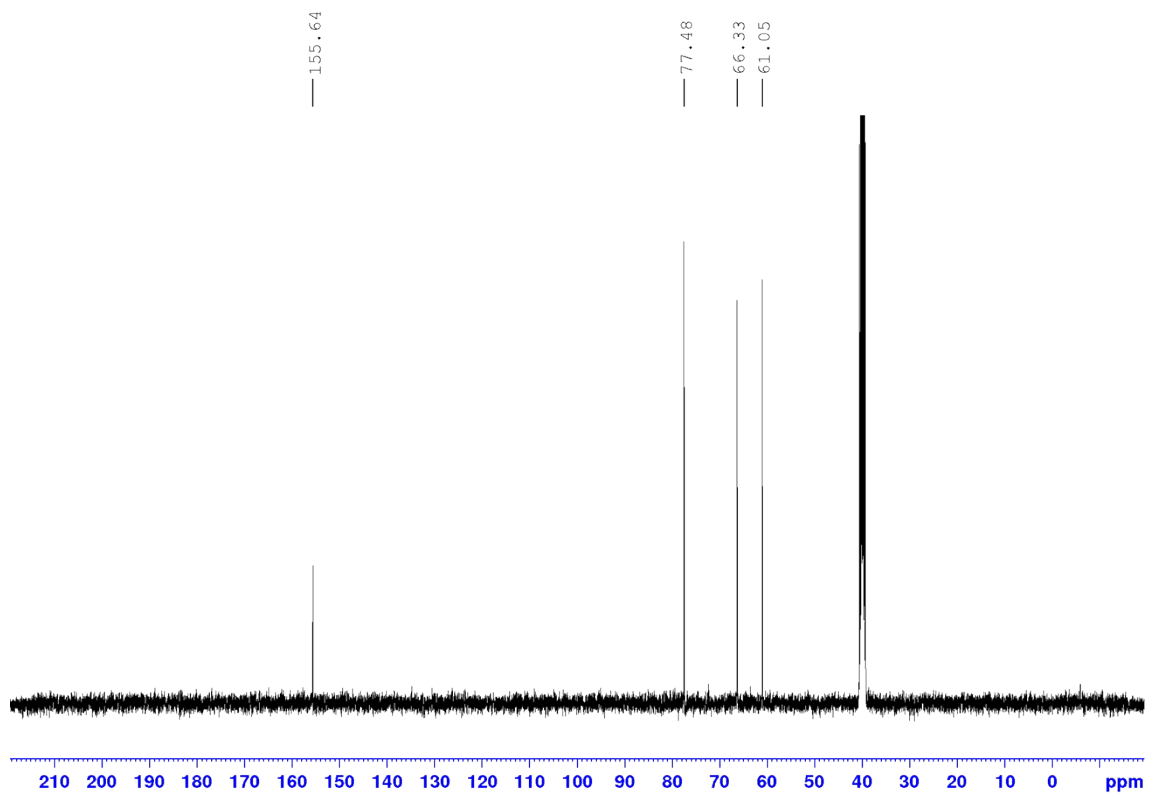

Figure S36.  $^{13}\text{C}\{^1\text{H}\}$  NMR (100 MHz,  $\text{DMSO-}d_6$ ) of product **18**.

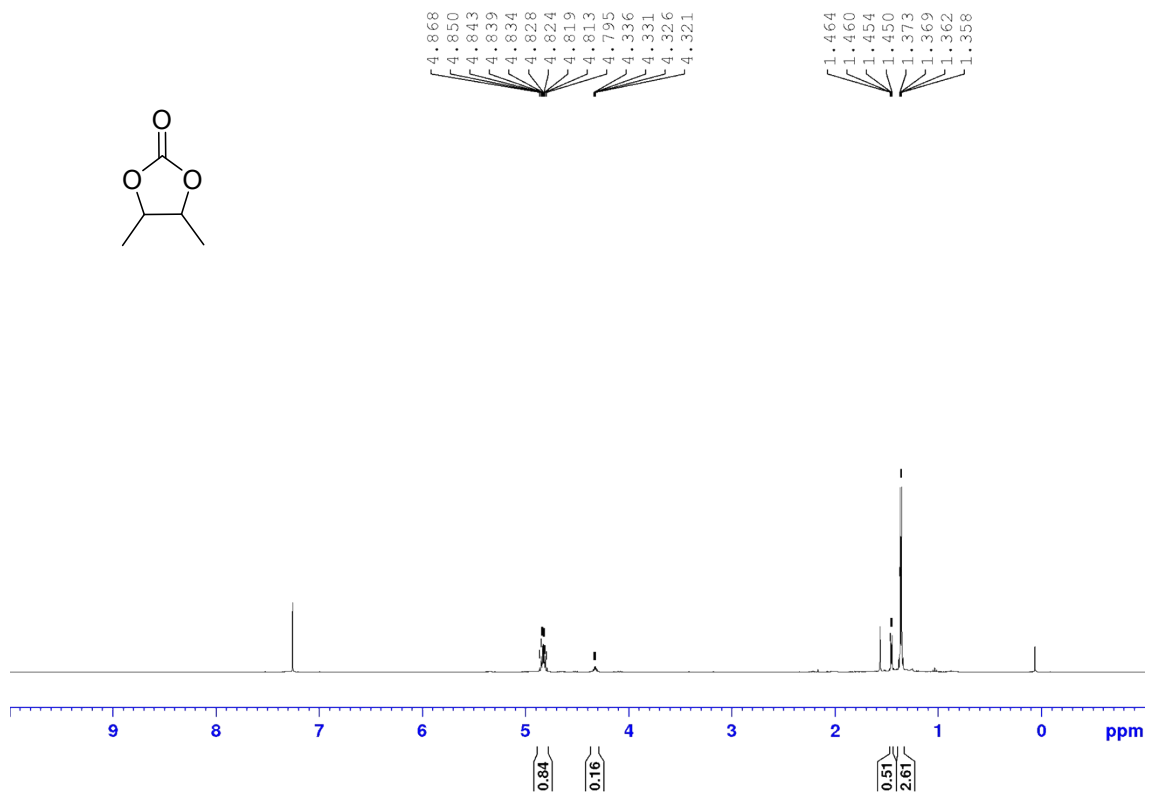

Figure S37.  $^1\text{H}$  NMR (400 MHz,  $\text{CDCl}_3$ ) of product **19**.

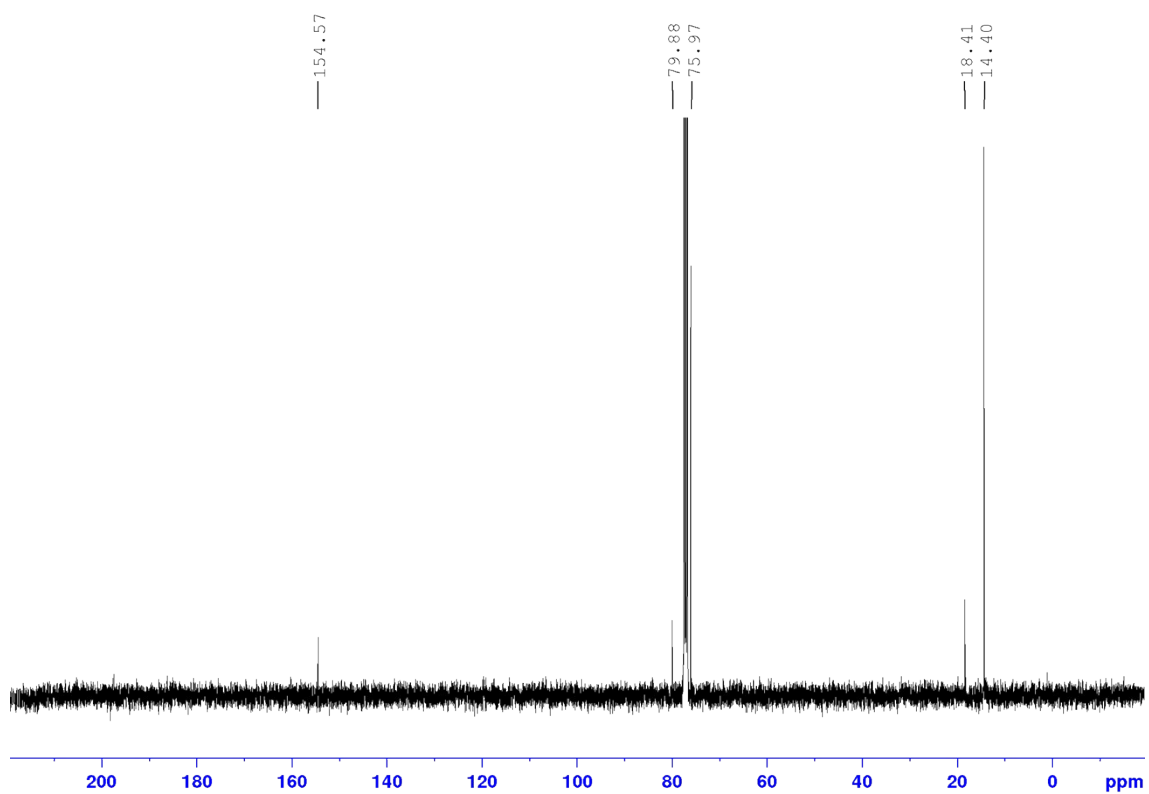

Figure S38.  $^{13}\text{C}\{^1\text{H}\}$  NMR (100 MHz,  $\text{CDCl}_3$ ) of product **19**.

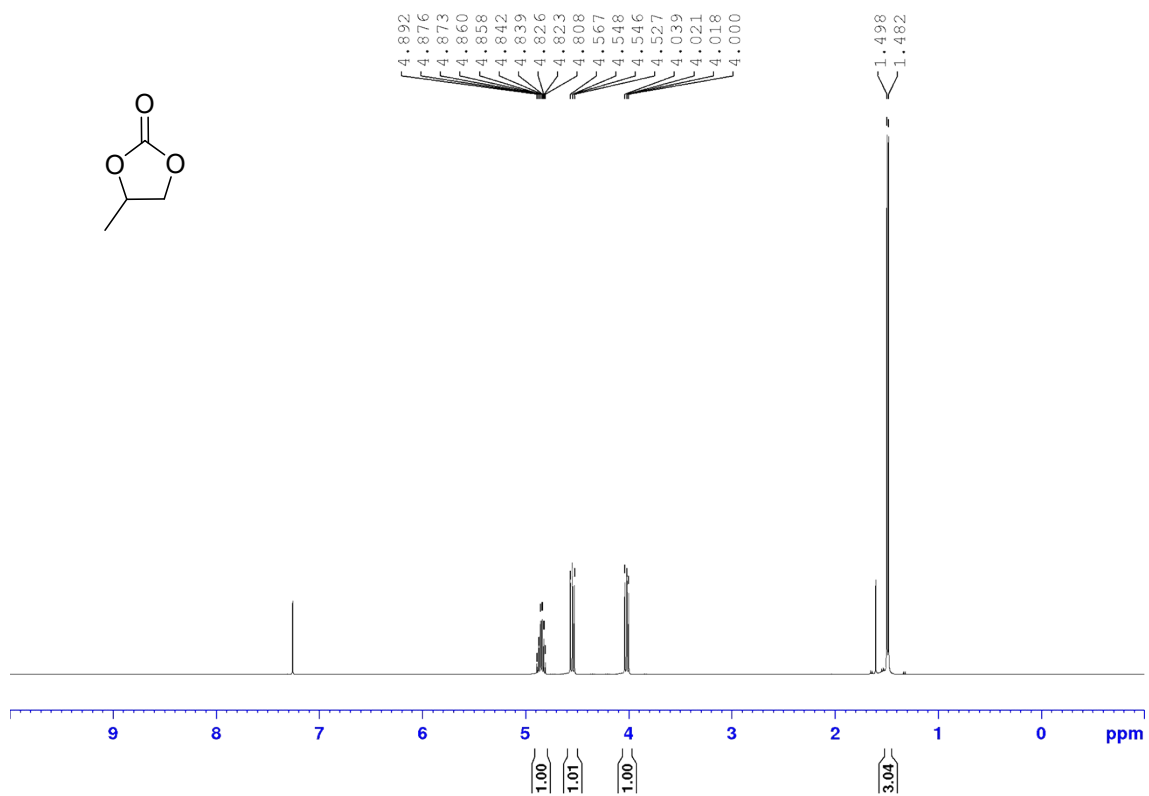

Figure S39. <sup>1</sup>H NMR (400 MHz, CDCl<sub>3</sub>) of product 20.

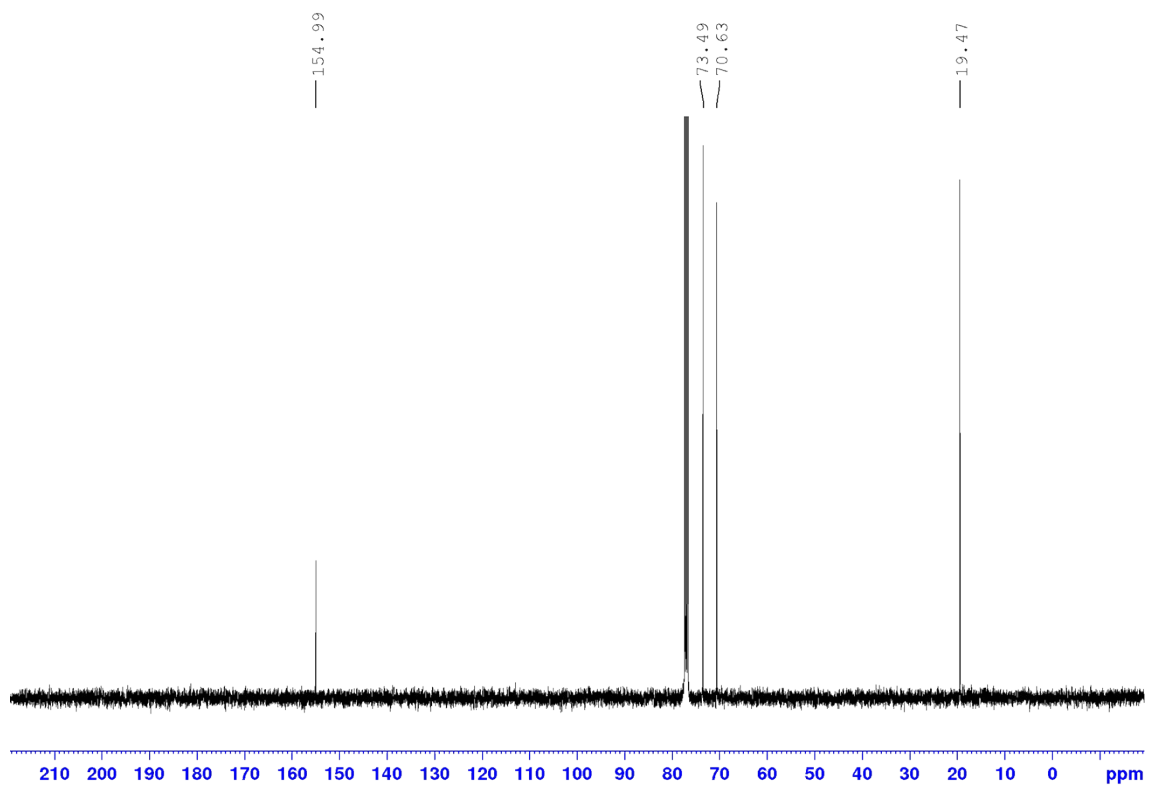

Figure S40. <sup>13</sup>C{<sup>1</sup>H} NMR (100 MHz, CDCl<sub>3</sub>) of product 20.

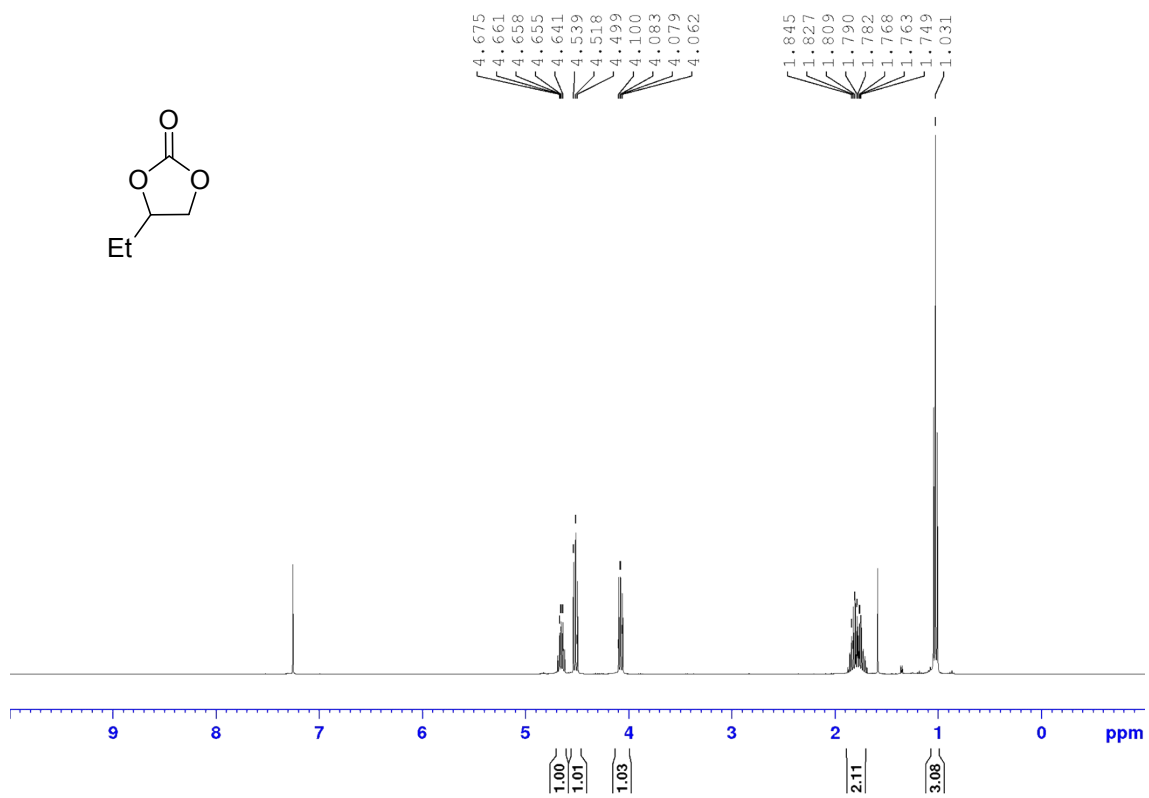

Figure S41.  $^1\text{H NMR}$  (400 MHz,  $\text{CDCl}_3$ ) of product **21**.

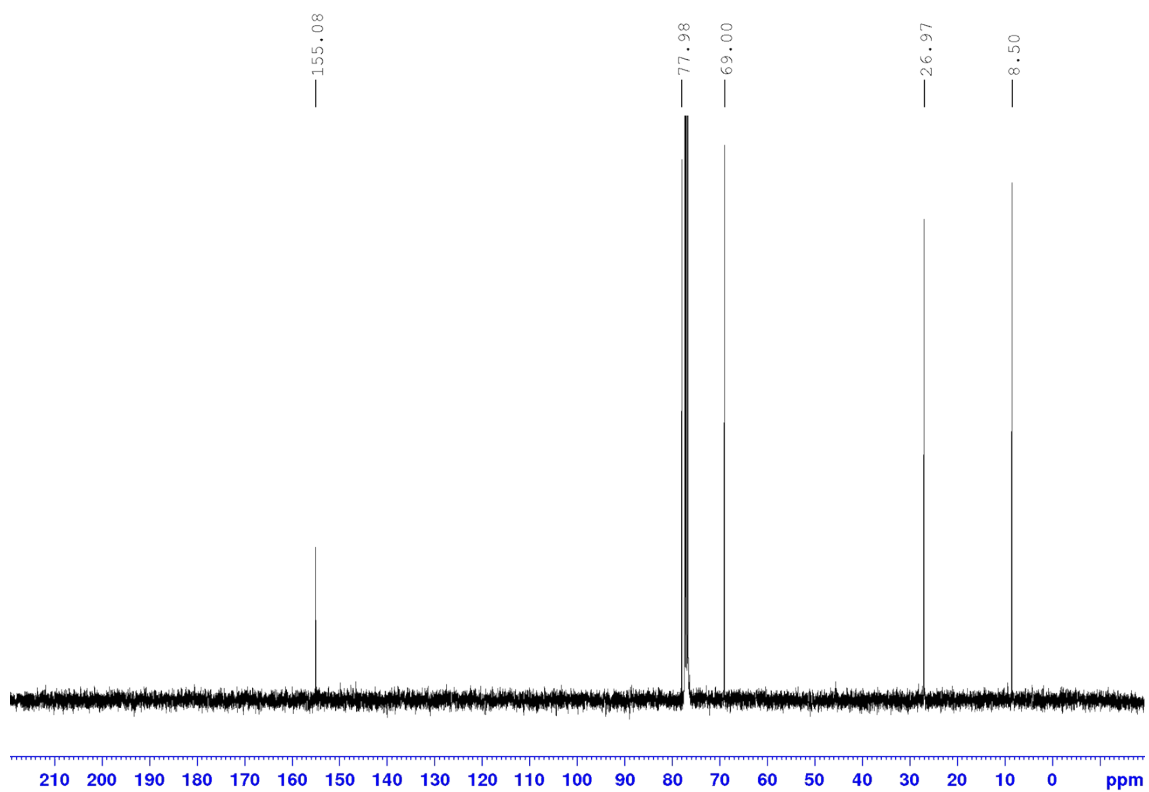

Figure S42.  $^{13}\text{C}\{^1\text{H}\}$  NMR (100 MHz,  $\text{CDCl}_3$ ) of product **21**.

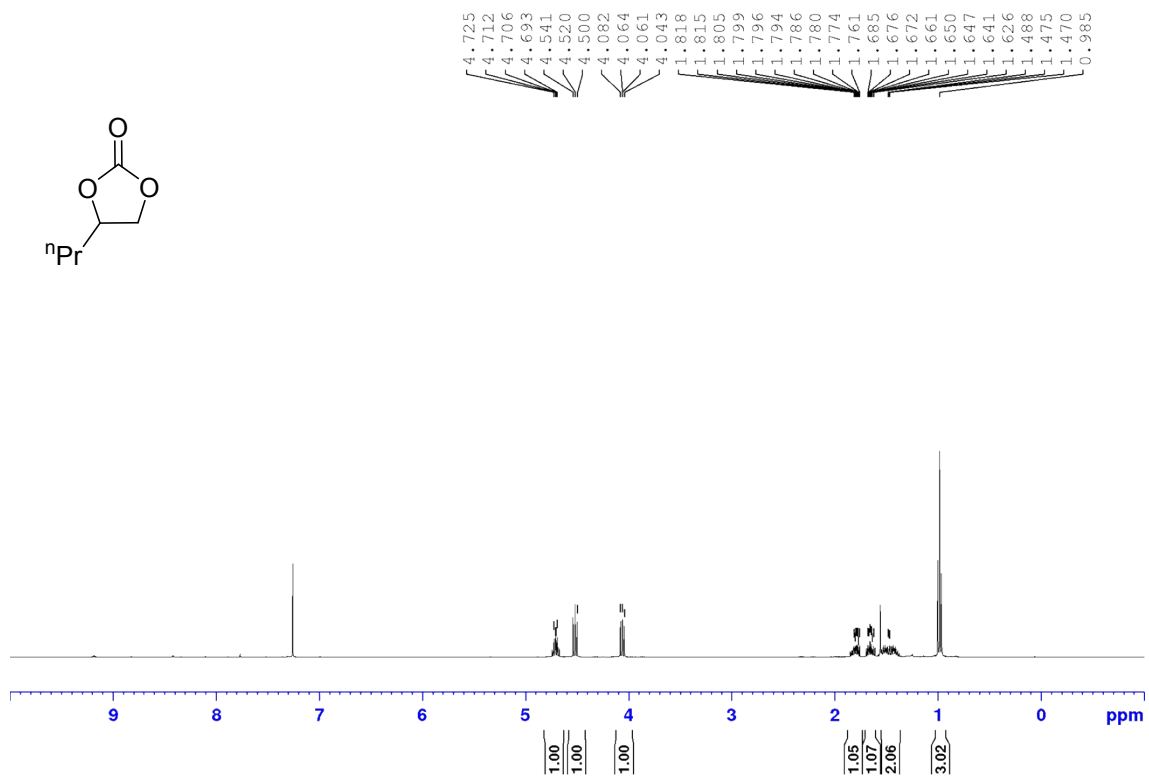

Figure S43.  $^1\text{H NMR}$  (400 MHz,  $\text{CDCl}_3$ ) of product **22**.

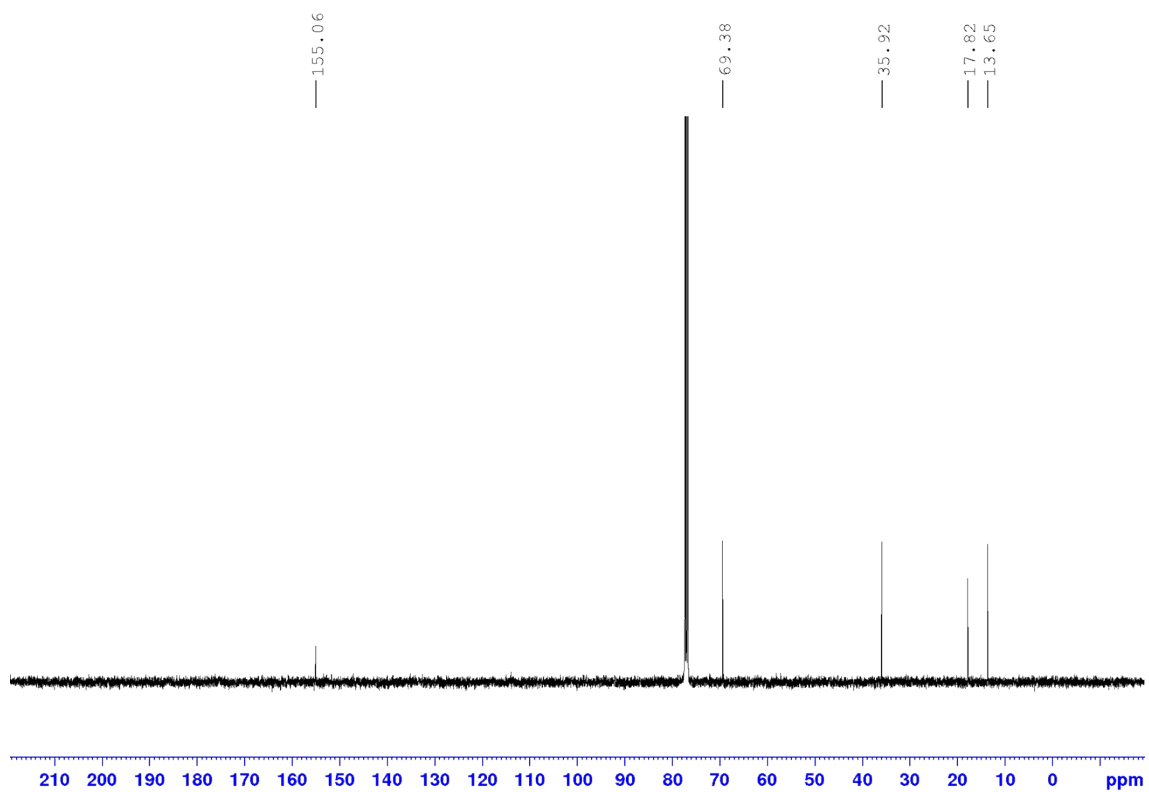

Figure S44.  $^{13}\text{C}\{^1\text{H}\}$  NMR (100 MHz,  $\text{CDCl}_3$ ) of product **22**.

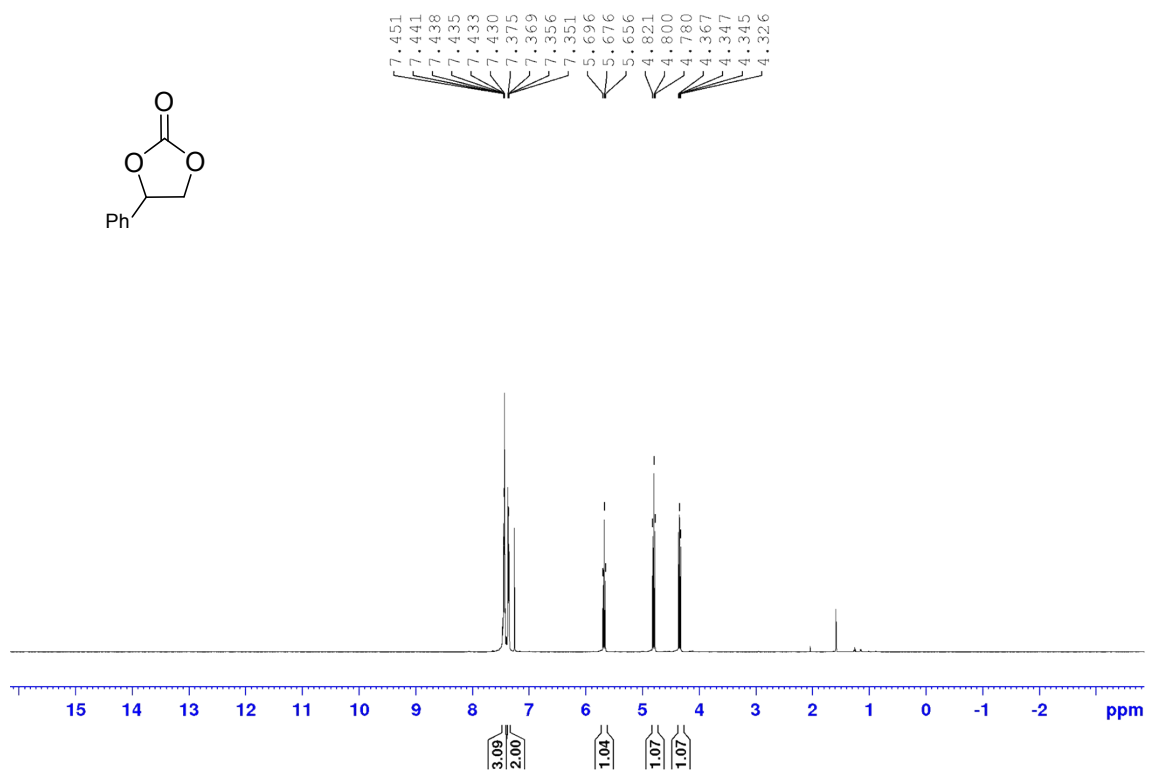

Figure S45. <sup>1</sup>H NMR (400 MHz, CDCl<sub>3</sub>) of product **23**.

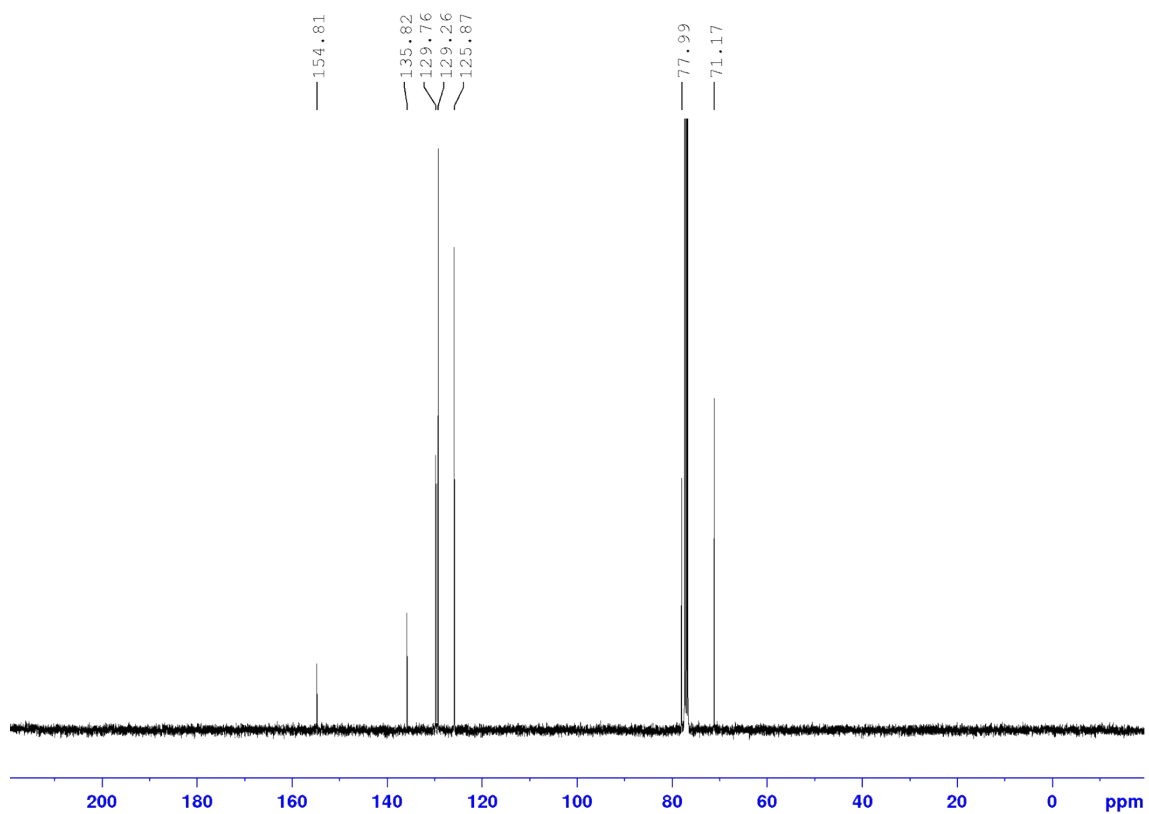

Figure S46. <sup>13</sup>C{<sup>1</sup>H} NMR (100 MHz, CDCl<sub>3</sub>) of product **23**.
